# Supplementary material for: ABCB1 Overexpression Is a Key Initiator of Resistance to Tyrosine Kinase Inhibitors in CML Cell Lines
Source: PubMed Central journal article supplement (PMC4990177; doi:10.1371/journal.pone.0161470), 2016-08-18

### **S1 Appendix: K562 nilotinib resistance intermediates do not harbour any Bcr-Abl kinase domain mutations**

DNA sequencing of the Bcr-Abl kinase domain of K562 control cells and nilotinib resistance intermediates was conducted and compared with the GenBank ABL reference sequence. Data demonstrate that neither the control cells nor any of the resistance intermediates contain mutations. Data were analysed using Mutation Surveyor Version 3.24 with each peak representing a DNA base (A=Adenine; C=Cytosine; G=Guanine; or T=Thymine) in the 5'-3' direction of the ABL sequence. The base number for both the reference sequence and the sequences of interest are indicated. The amino acid and corresponding residue number are also indicated. The amino acid sequences exactly match the reference sequence with no kinase domain mutations present. NIL=nilotinib

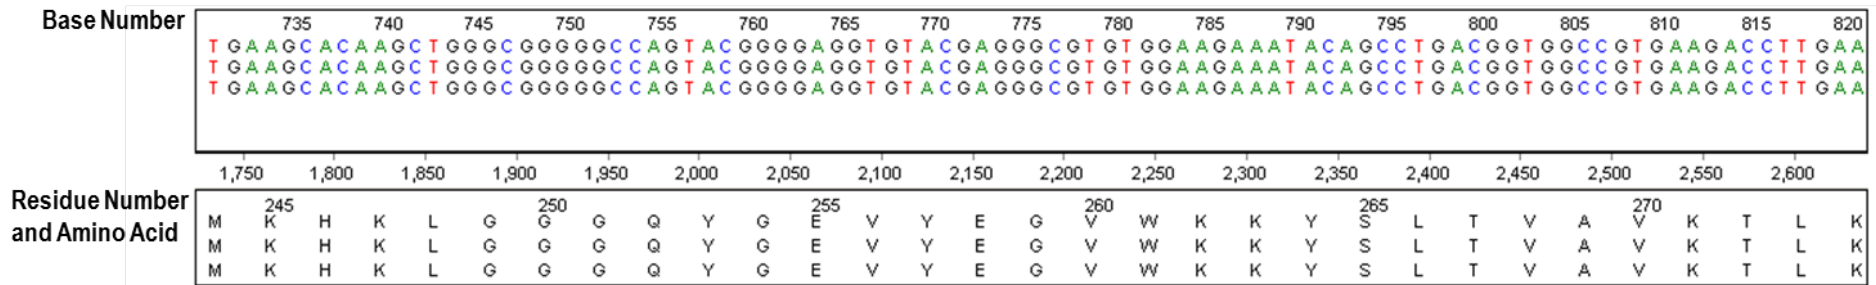

**ABL Reference Sequence**

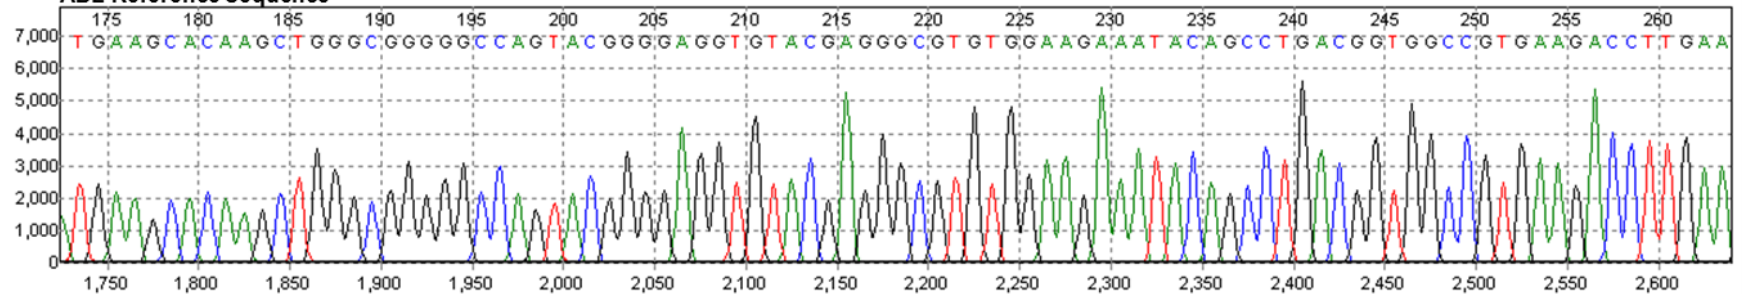

**Control**

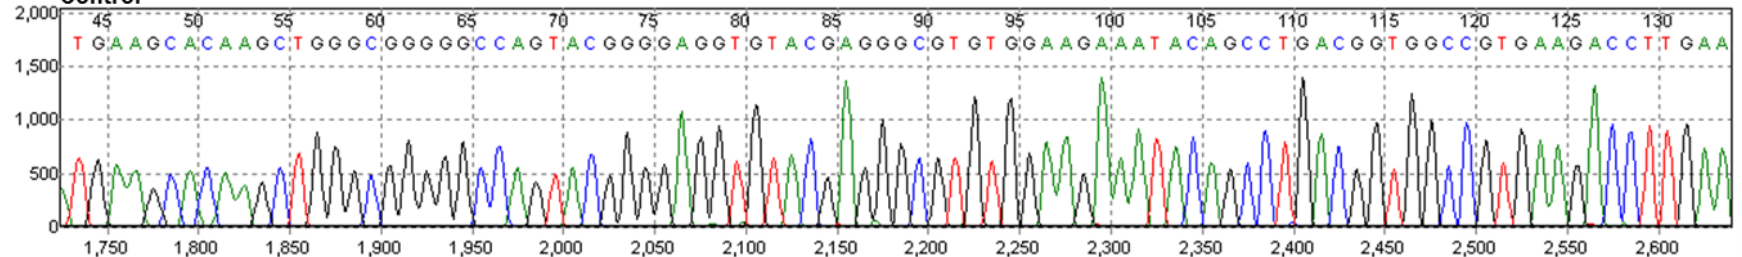

**#1 NIL**

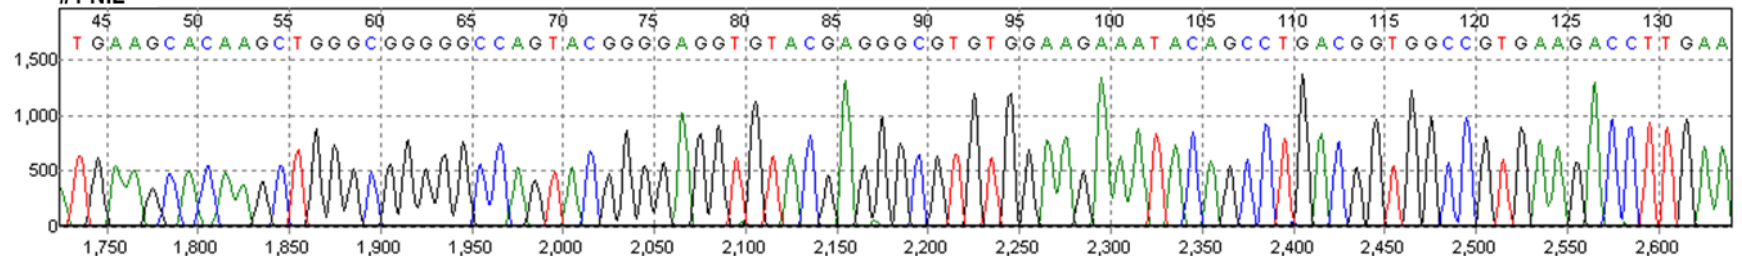

825 830 835 840 845 850 855 860 865 870 875 880 885 890 895 900 905 910  
 G A G G A C A C C A T G G A G G T G G A A G A G T T C T T G A A A G A A G C T G C A G T C A T G A A A G A G A T C A A A C A C C C T A A C C T G G T G C A G C T C C T T G G G G T C T G  
 G A G G A C A C C A T G G A G G T G G A A G A G T T C T T G A A A G A A G C T G C A G T C A T G A A A G A G A T C A A A C A C C C T A A C C T G G T G C A G C T C C T T G G G G T C T G  
 G A G G A C A C C A T G G A G G T G G A A G A G T T C T T G A A A G A A G C T G C A G T C A T G A A A G A G A T C A A A C A C C C T A A C C T G G T G C A G C T C C T T G G G G T C T G

2,650 2,700 2,750 2,800 2,850 2,900 2,950 3,000 3,050 3,100 3,150 3,200 3,250 3,300 3,350 3,400 3,450 3,500 3,550

275 280 285 290 295 300 305  
 E D T M E V E E F L K E A A V M K E I K H P N L V Q L L G V C  
 E D T M E V E E F L K E A A V M K E I K H P N L V Q L L G V C  
 E D T M E V E E F L K E A A V M K E I K H P N L V Q L L G V C

**ABL Reference Sequence**

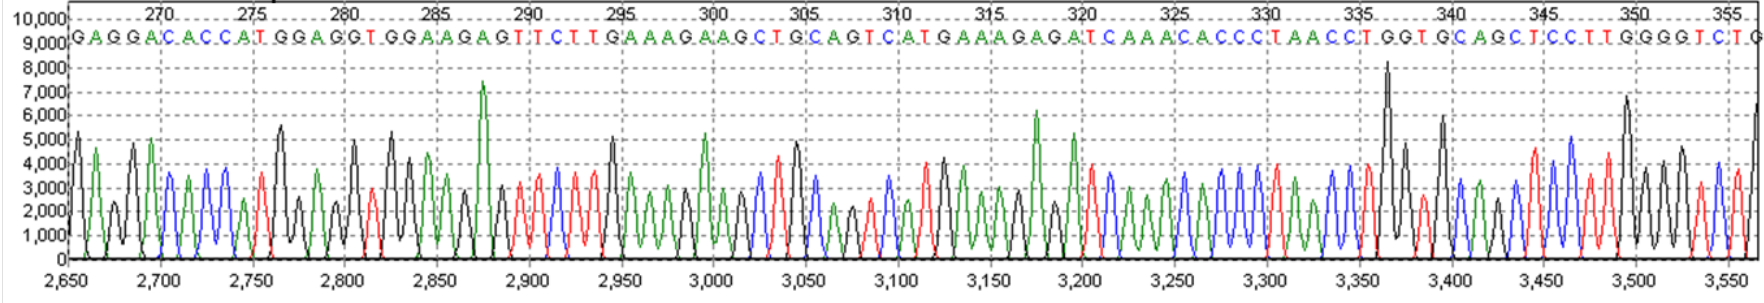

**Control**

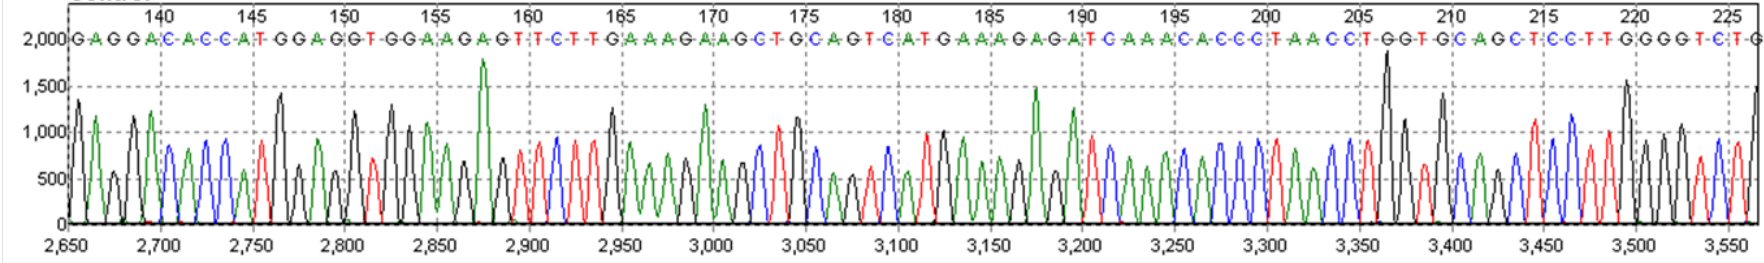

**#1 NIL**

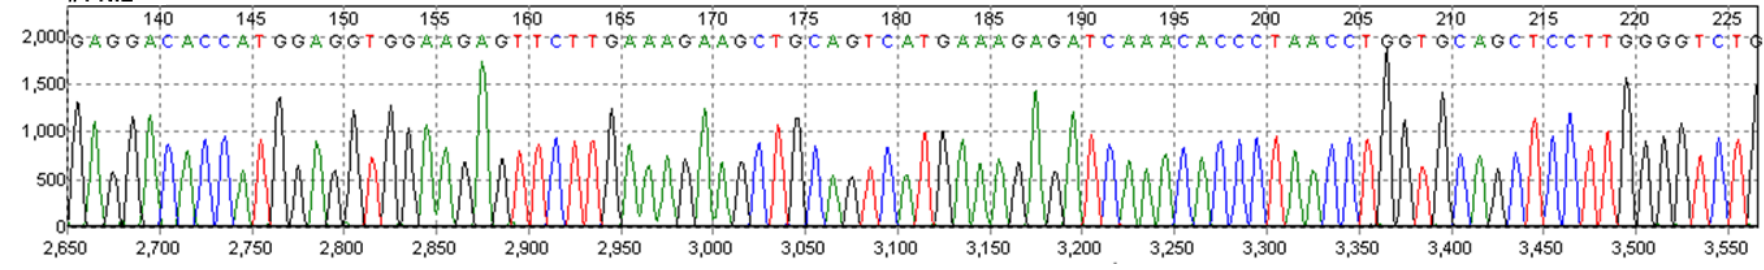

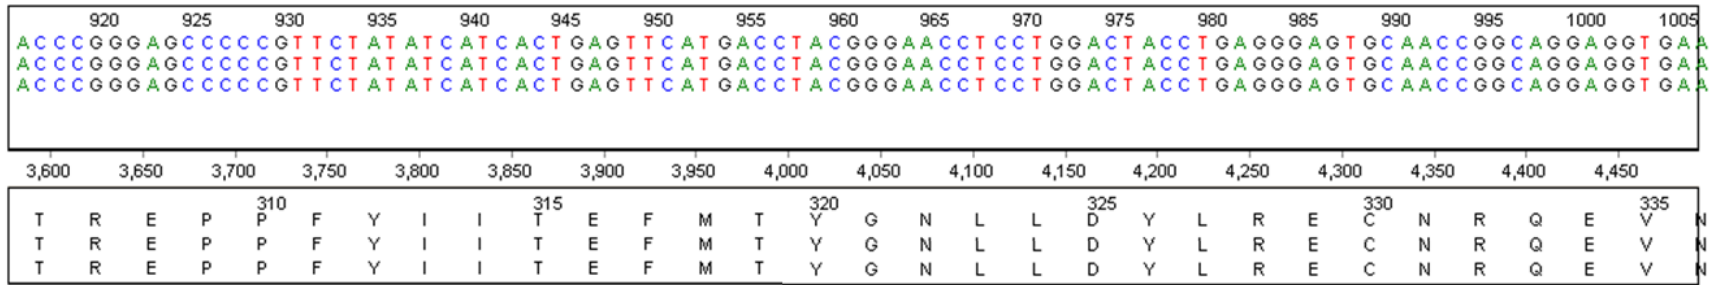

**ABL Reference Sequence**

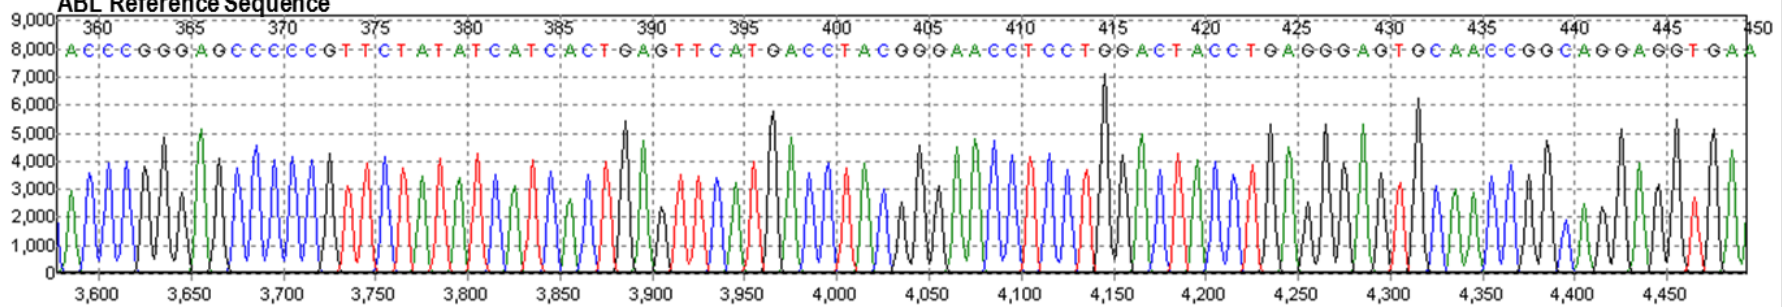

**Control**

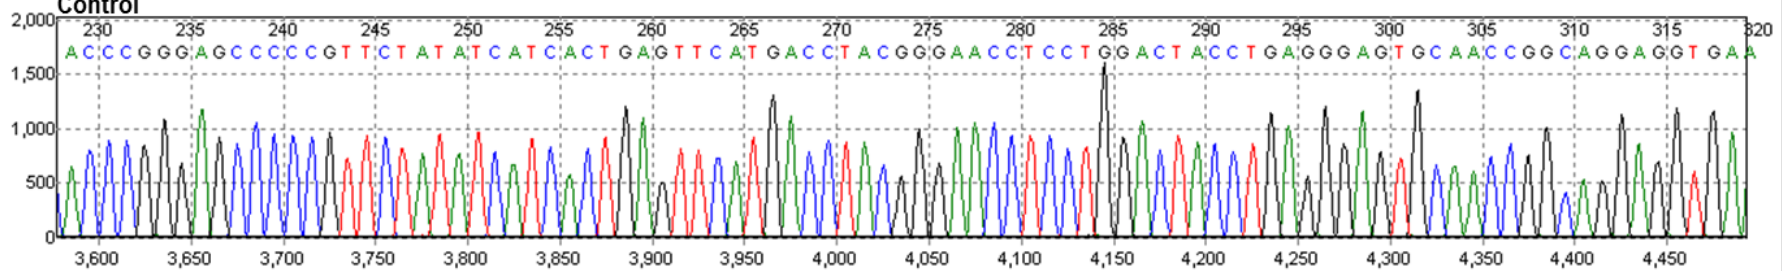

**#1 NIL**

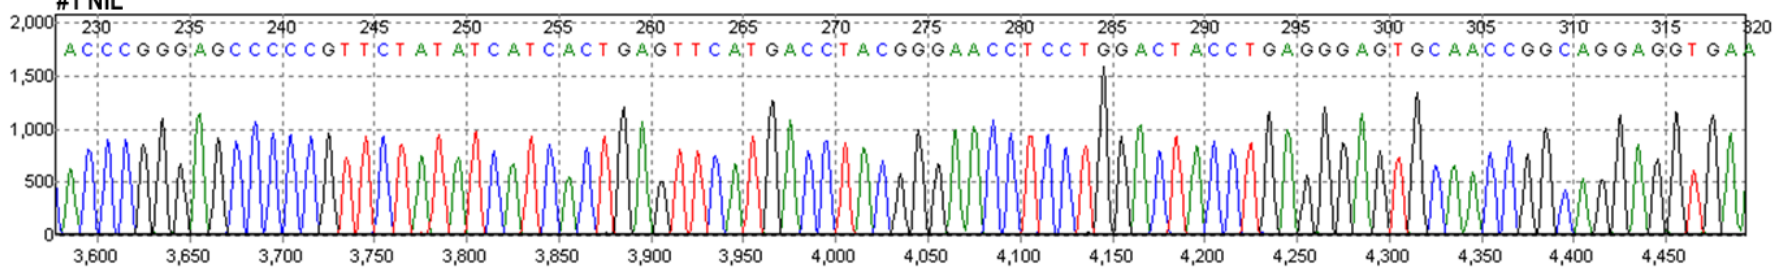

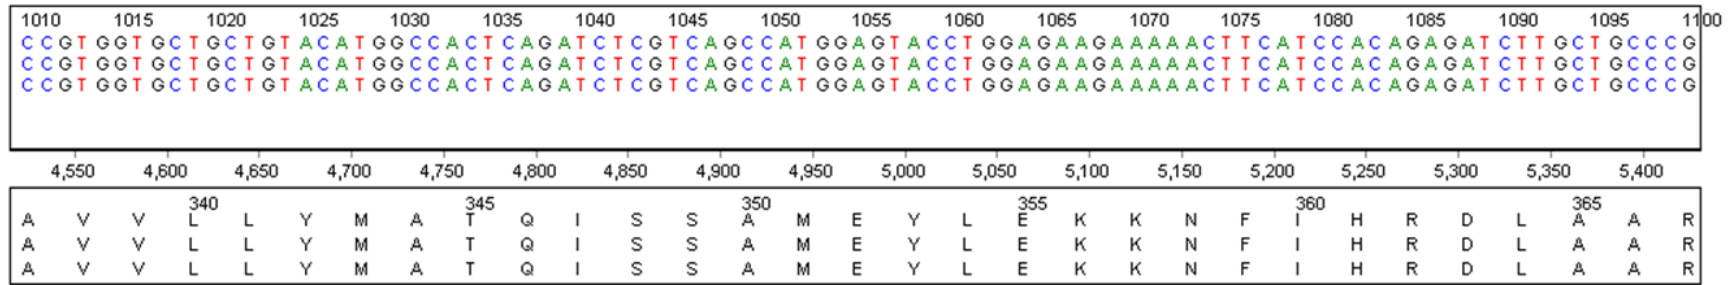

**ABL Reference Sequence**

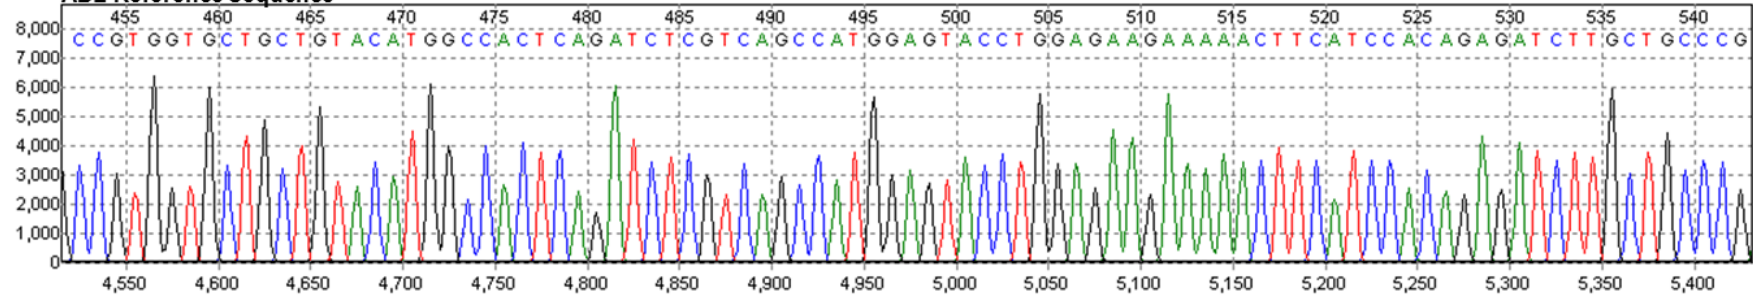

**Control**

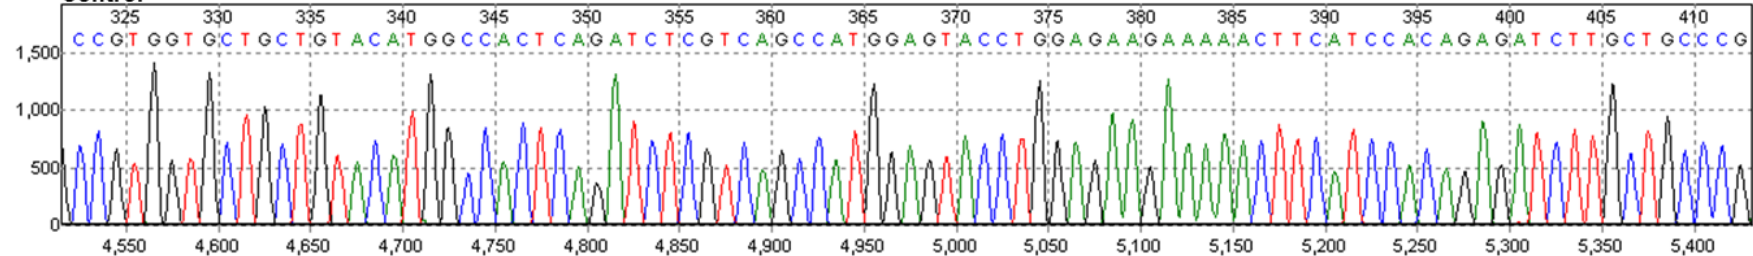

**#1 NIL**

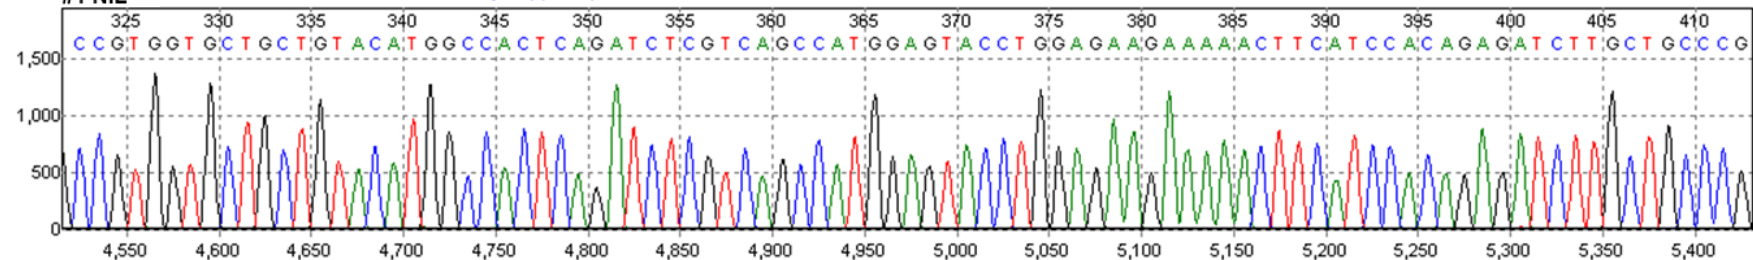

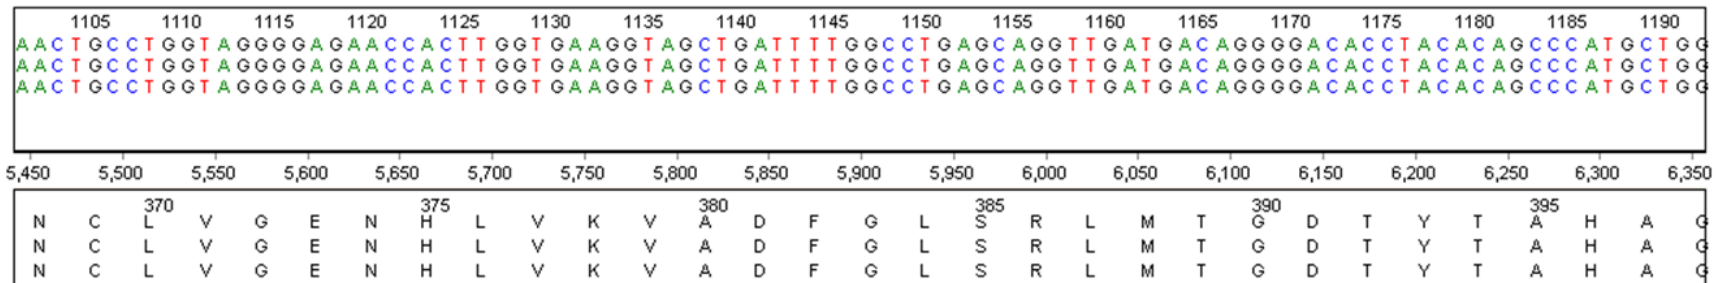

**ABL Reference Sequence**

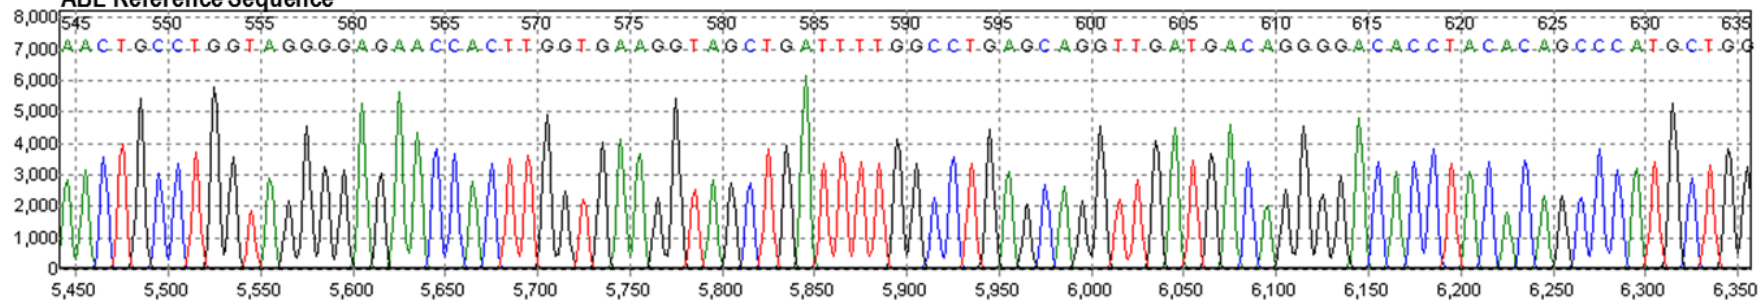

**Control**

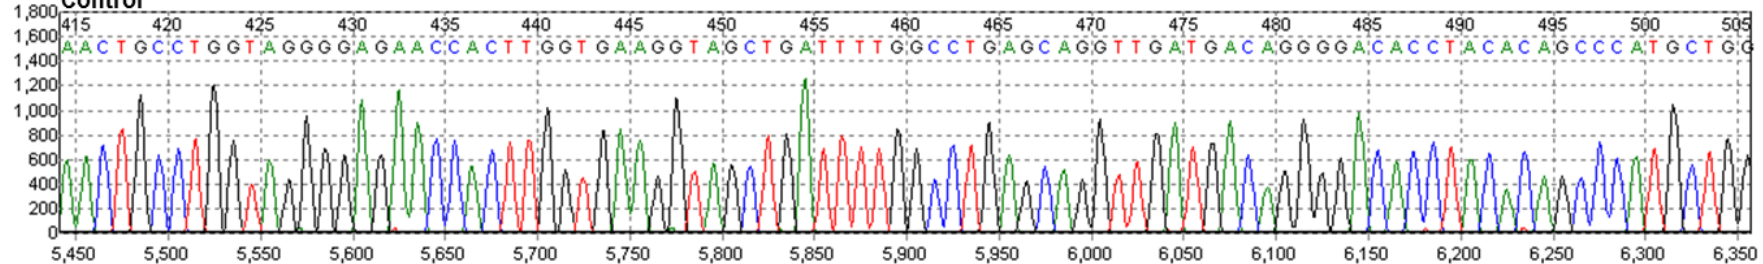

**#1 NIL**

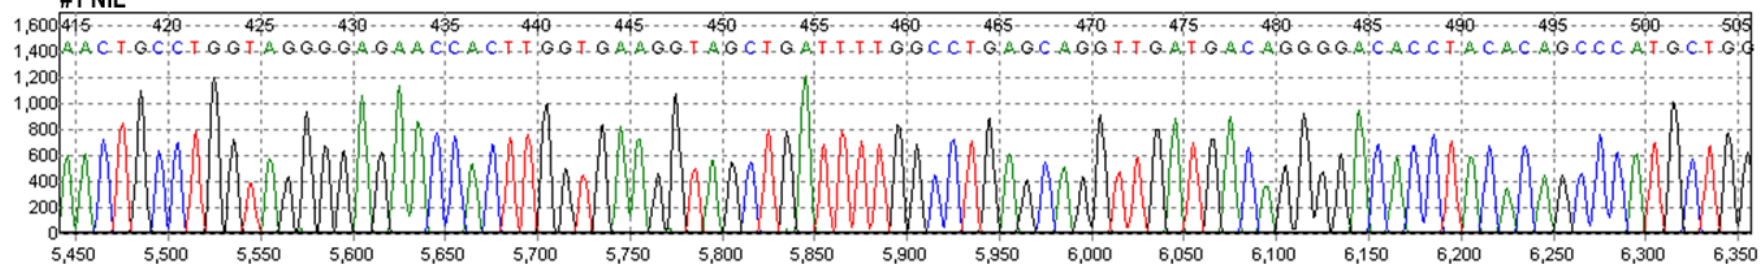



825 830 835 840 845 850 855 860 865 870 875 880 885 890 895 900 905 910  
 GAGGACACCATGGAGGTGGAAGAGTTCTTGAAAGAAAGCTGCAGTCATGAAAGAGATCAAACACCCCTAACCTGGTGCAGCTCCTTTGGGGTCTG  
 GAGGACACCATGGAGGTGGAAGAGTTCTTGAAAGAAAGCTGCAGTCATGAAAGAGATCAAACACCCCTAACCTGGTGCAGCTCCTTTGGGGTCTG  
 GAGGACACCATGGAGGTGGAAGAGTTCTTGAAAGAAAGCTGCAGTCATGAAAGAGATCAAACACCCCTAACCTGGTGCAGCTCCTTTGGGGTCTG

2,650 2,700 2,750 2,800 2,850 2,900 2,950 3,000 3,050 3,100 3,150 3,200 3,250 3,300 3,350 3,400 3,450 3,500 3,550

|     |   |   |   |   |     |   |   |   |   |   |     |   |   |   |   |   |     |   |   |   |   |   |     |   |   |   |   |   |     |   |   |   |   |   |     |   |
|-----|---|---|---|---|-----|---|---|---|---|---|-----|---|---|---|---|---|-----|---|---|---|---|---|-----|---|---|---|---|---|-----|---|---|---|---|---|-----|---|
| 275 | D | T | M | E | 280 | V | E | E | F | L | 285 | K | E | A | A | V | 290 | M | K | E | I | K | 295 | H | P | N | L | V | 300 | Q | L | L | G | V | 305 | C |
| E   | D | T | M | E | V   | E | E | F | L | K | E   | A | A | V | M | K | E   | I | K | H | P | N | L   | V | Q | L | L | G | V   | C |   |   |   |   |     |   |
| E   | D | T | M | E | V   | E | E | F | L | K | E   | A | A | V | M | K | E   | I | K | H | P | N | L   | V | Q | L | L | G | V   | C |   |   |   |   |     |   |

**ABL Reference Sequence**

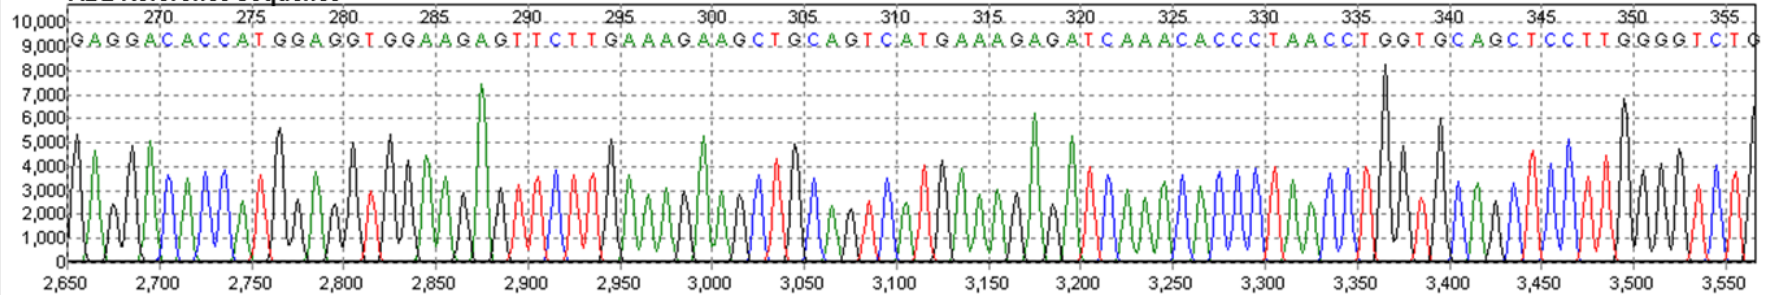

**#2 NIL**

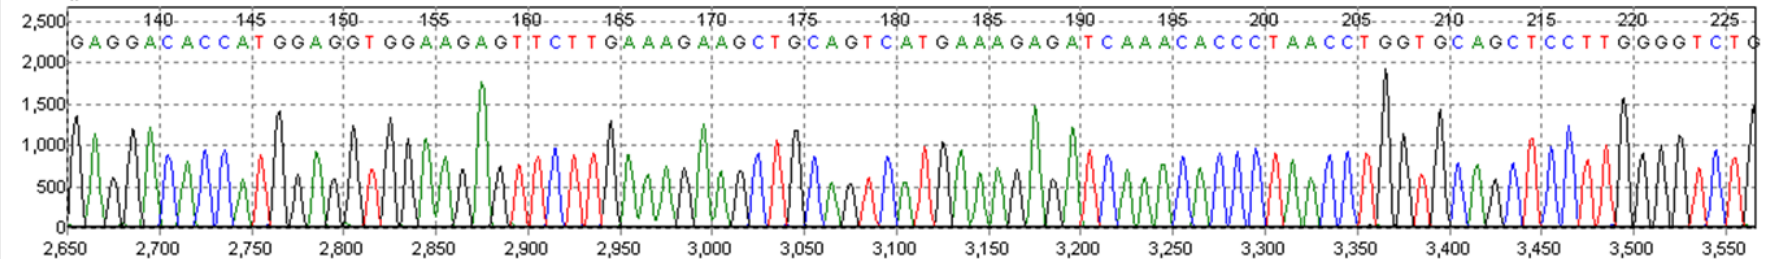

**#3 NIL**

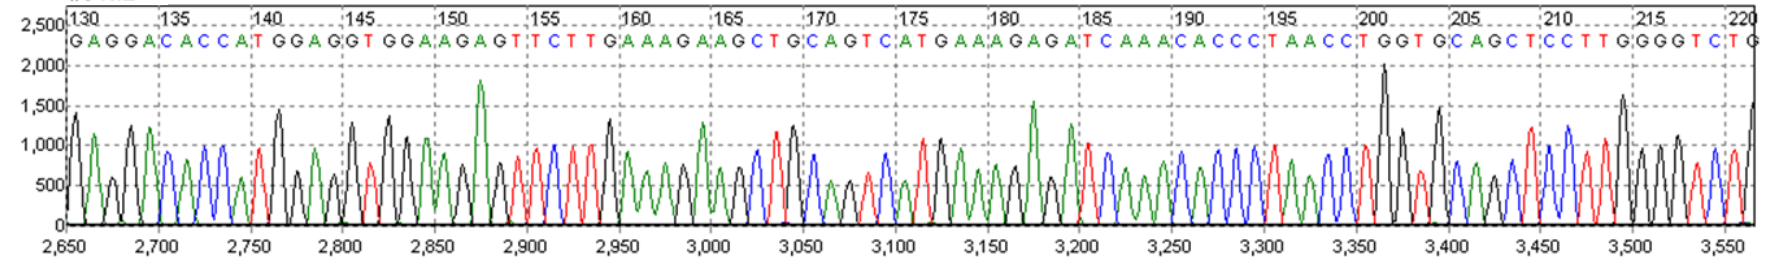



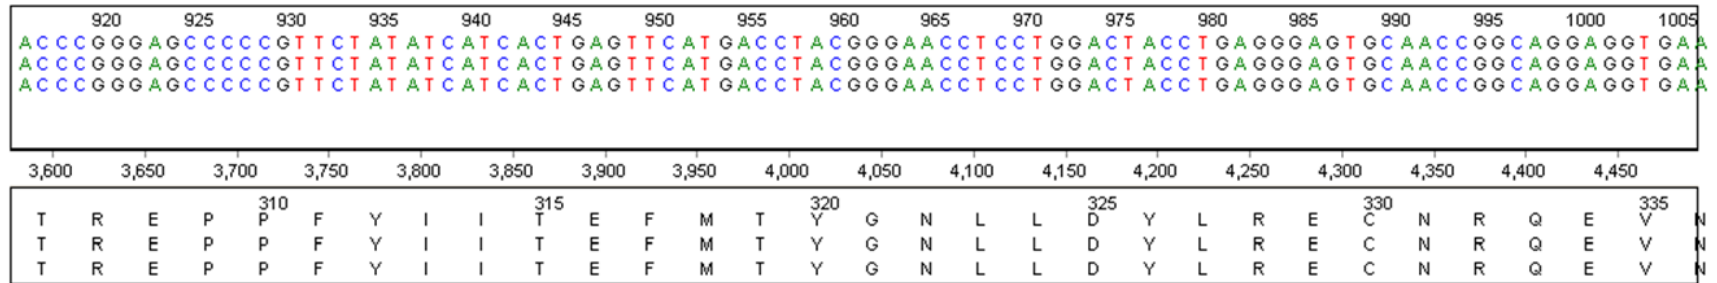

**ABL Reference Sequence**

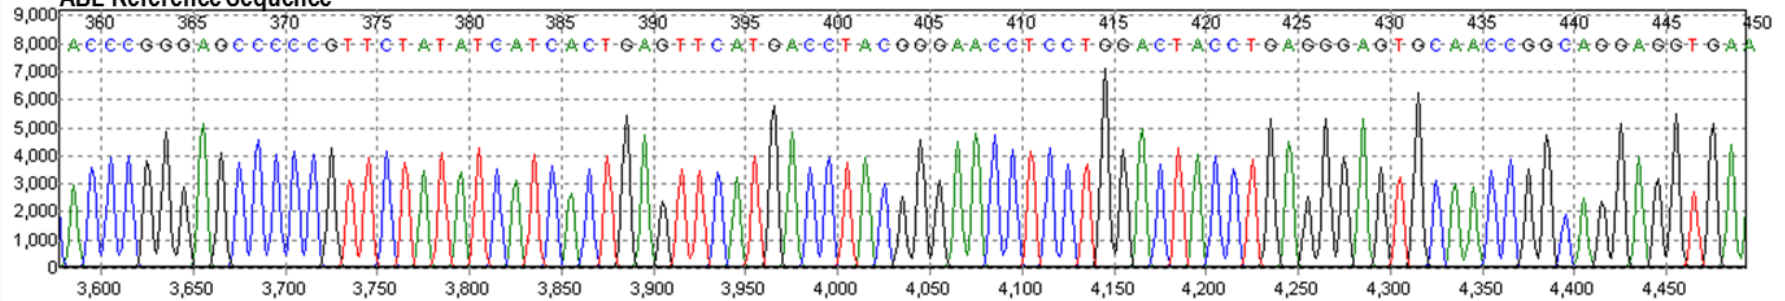

**#2 NIL**

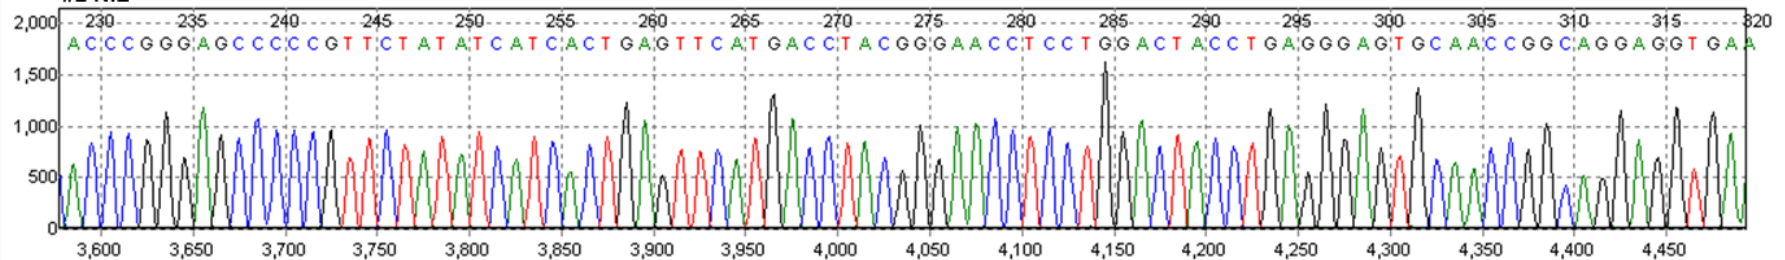

**#3 NIL**

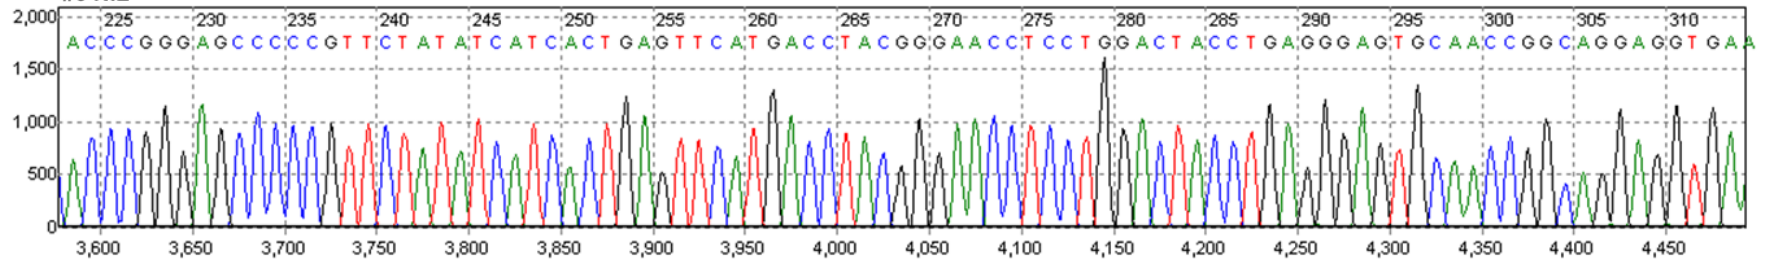

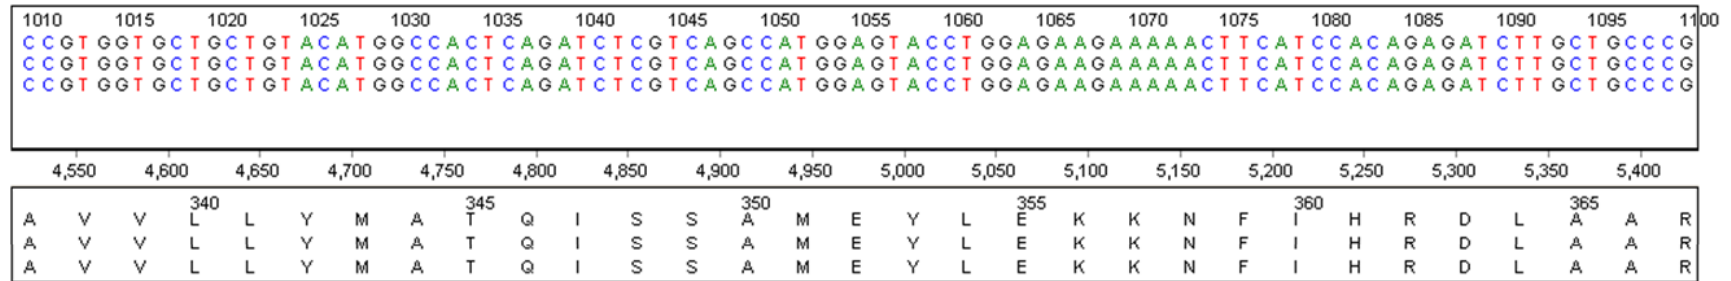

**ABL Reference Sequence**

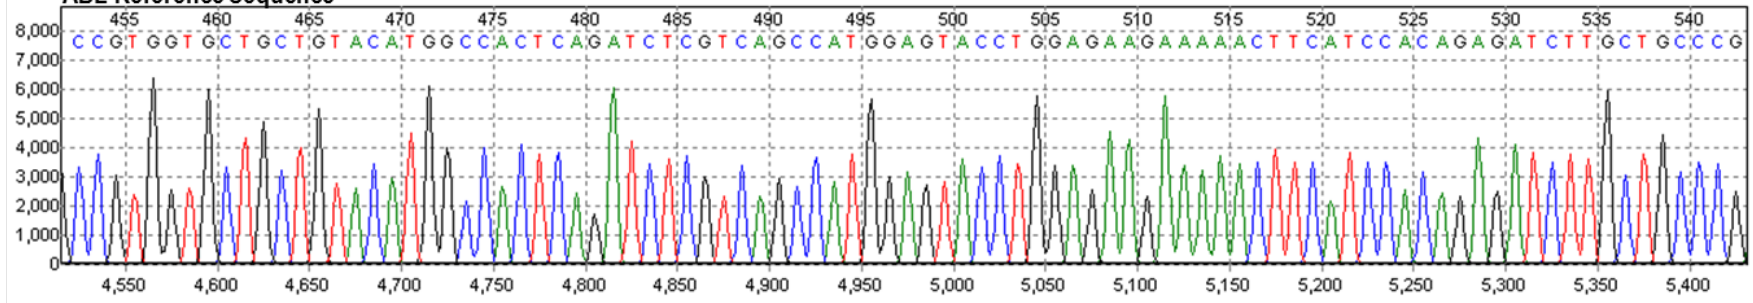

**#2 NIL**

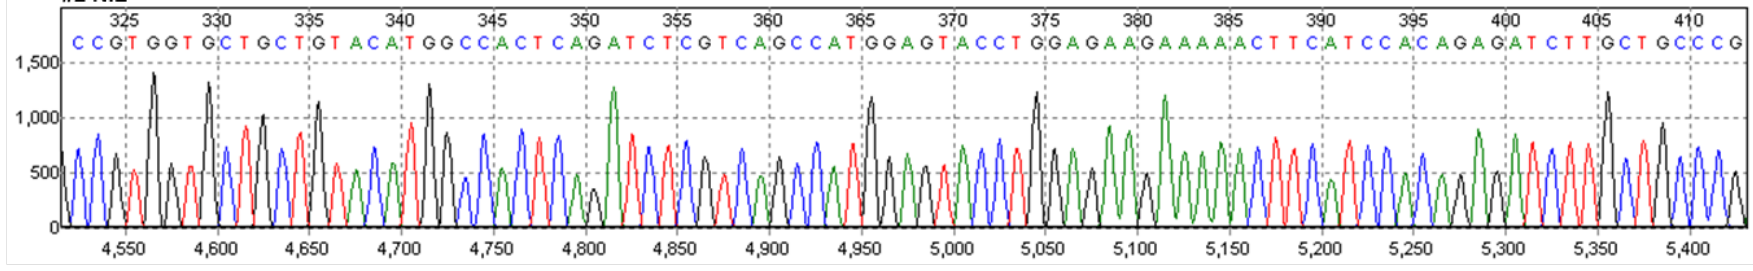

**#3 NIL**

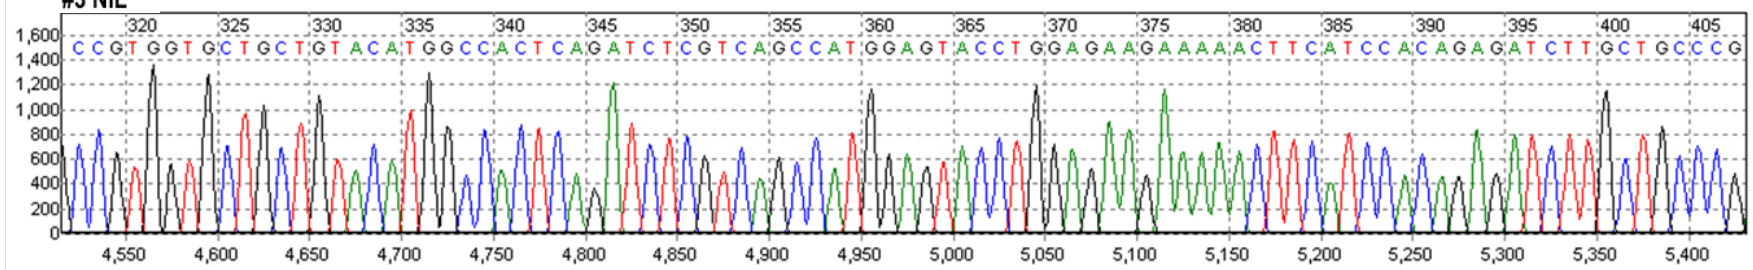

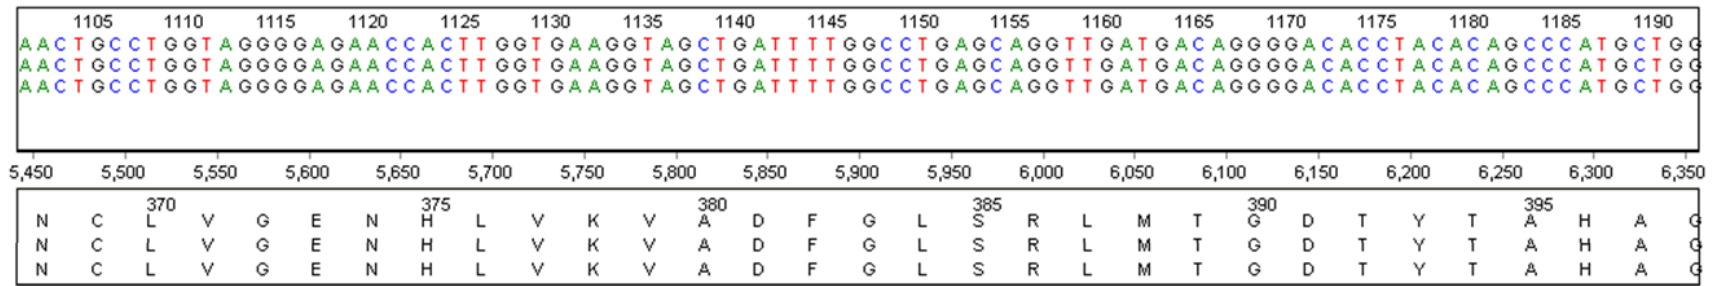

**ABL Reference Sequence**

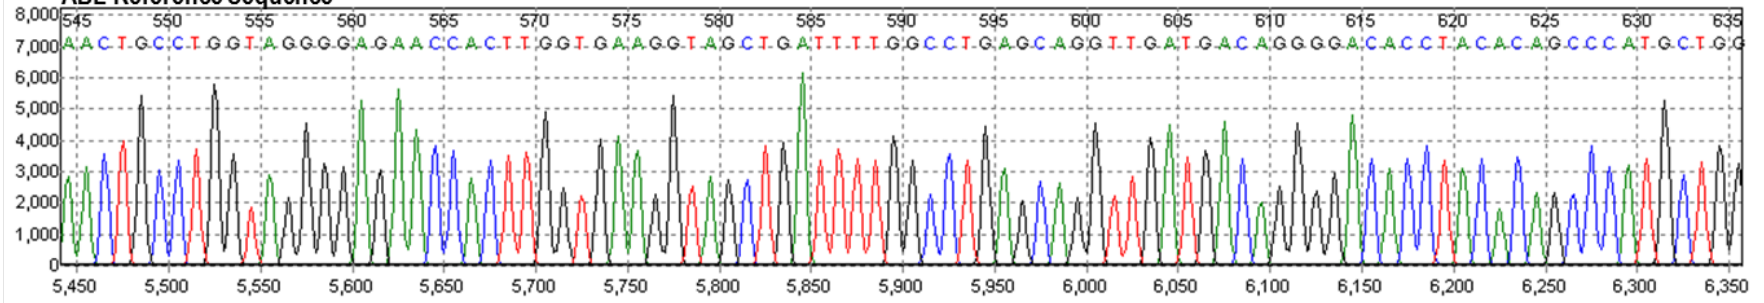

**#2 NIL**

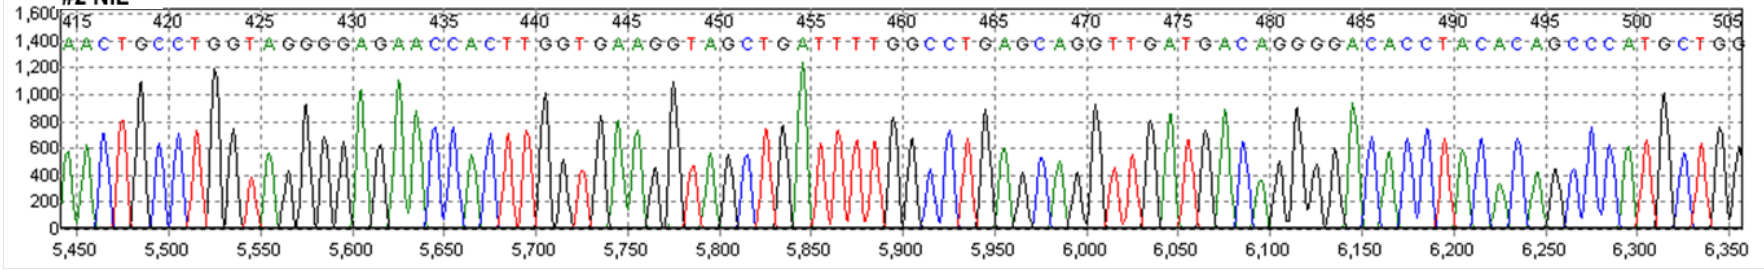

**#3 NIL**

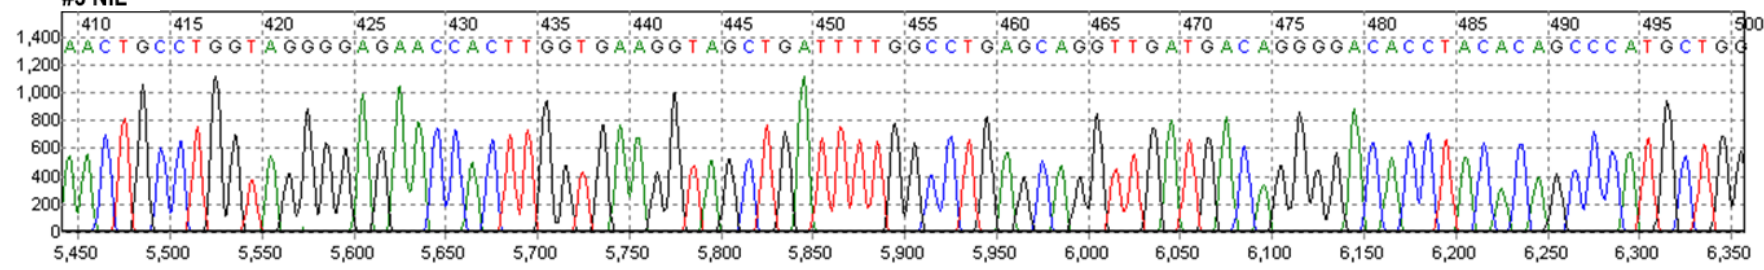

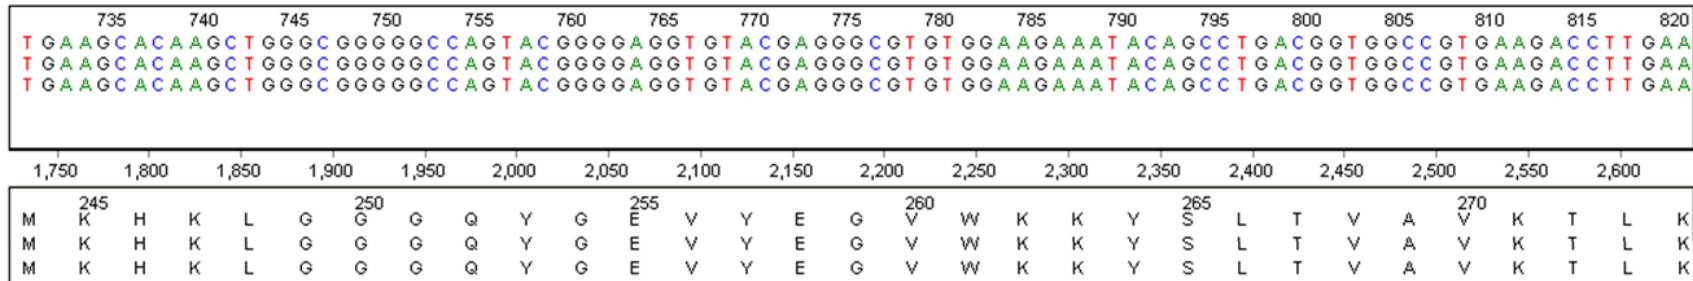

**ABL Reference Sequence**

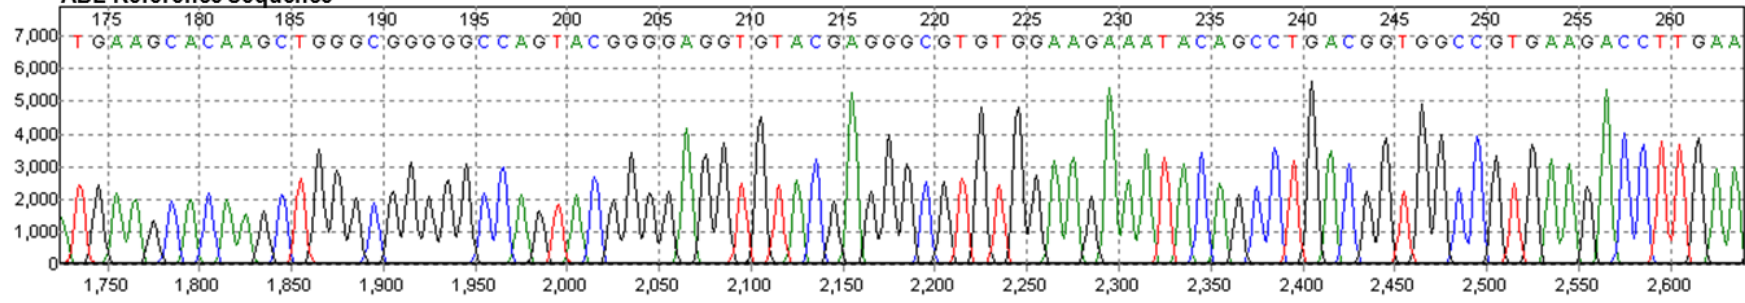

**#4 NIL**

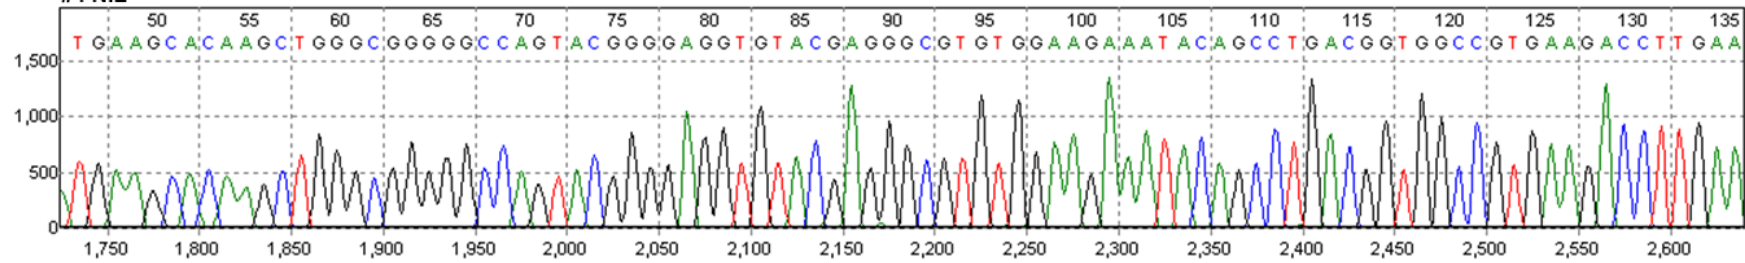

**#5 NIL**

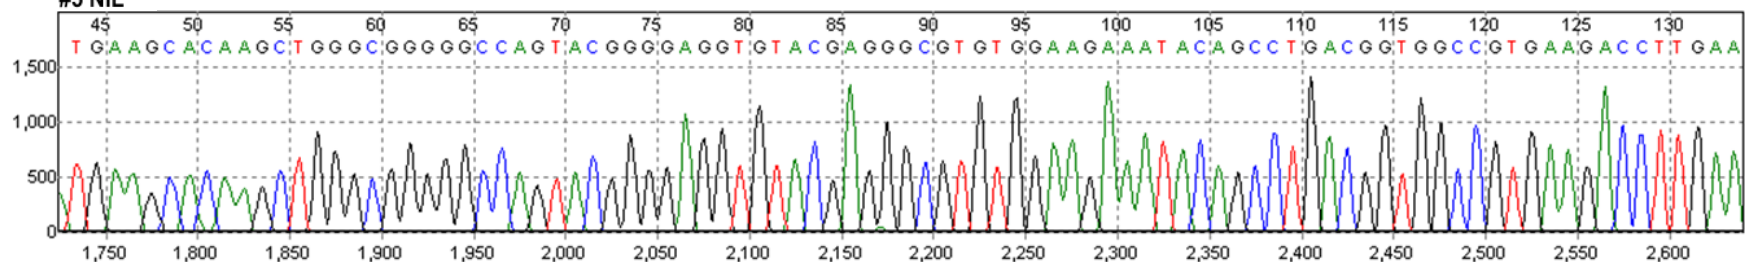

825 830 835 840 845 850 855 860 865 870 875 880 885 890 895 900 905 910  
 G A G G A C A C C A T G G A G G T G G A A G A G T T C T T G A A A G A A G C T G C A G T C A T G A A A G A G A T C A A A C A C C C T A A C C T G G T G C A G C T C C T T G G G G T C T G  
 G A G G A C A C C A T G G A G G T G G A A G A G T T C T T G A A A G A A G C T G C A G T C A T G A A A G A G A T C A A A C A C C C T A A C C T G G T G C A G C T C C T T G G G G T C T G  
 G A G G A C A C C A T G G A G G T G G A A G A G T T C T T G A A A G A A G C T G C A G T C A T G A A A G A G A T C A A A C A C C C T A A C C T G G T G C A G C T C C T T G G G G T C T G

2,650 2,700 2,750 2,800 2,850 2,900 2,950 3,000 3,050 3,100 3,150 3,200 3,250 3,300 3,350 3,400 3,450 3,500 3,550

275 280 285 290 295 300 305 310 315 320 325 330 335 340 345 350 355  
 E D T M E V E E F L K E A A V M K E I K H P N L V Q L L G V C  
 E D T M E V E E F L K E A A V M K E I K H P N L V Q L L G V C  
 E D T M E V E E F L K E A A V M K E I K H P N L V Q L L G V C

**ABL Reference Sequence**

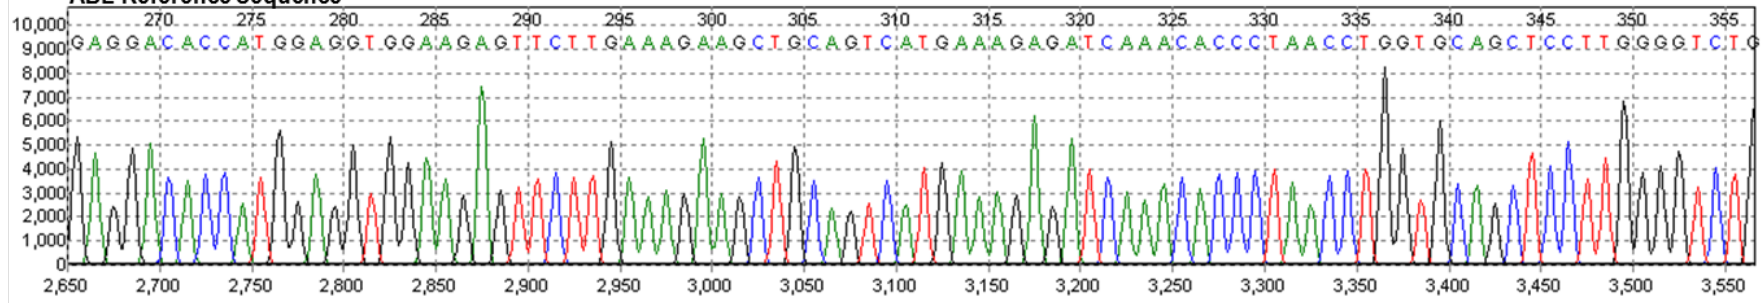

**#4 NIL**

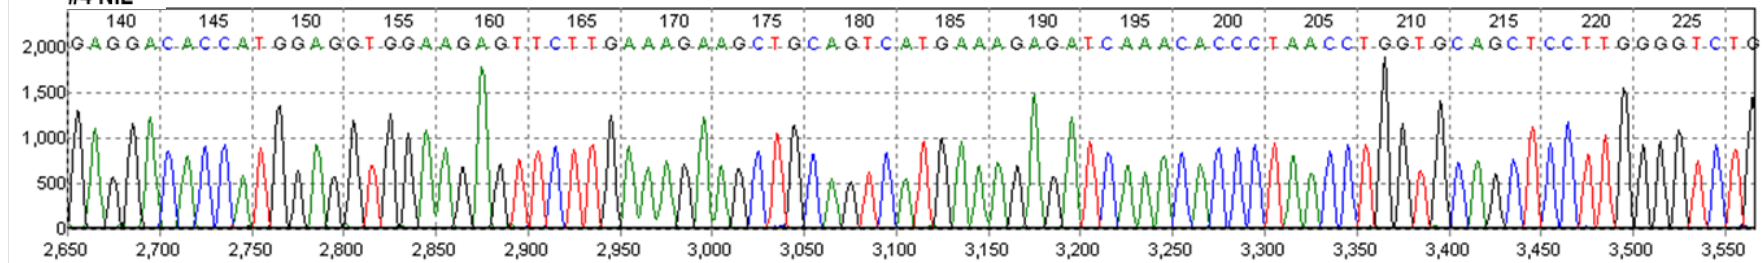

**#5 NIL**

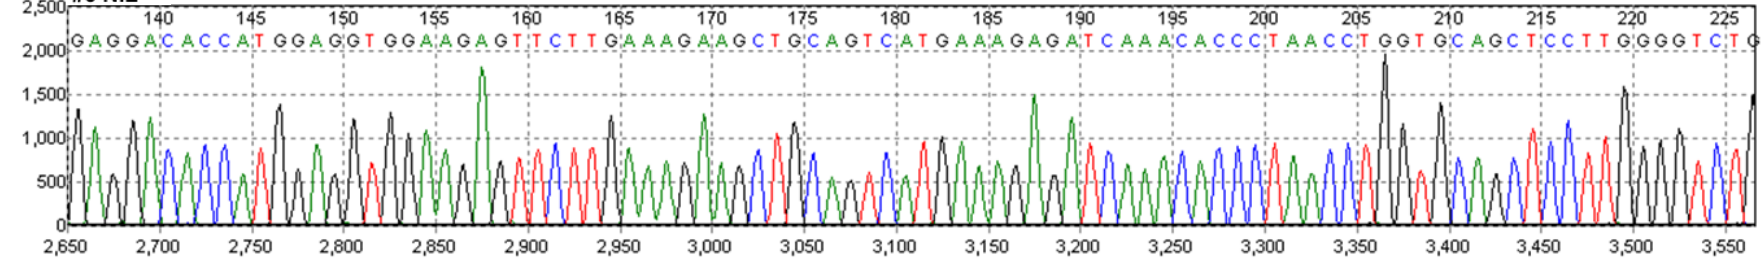

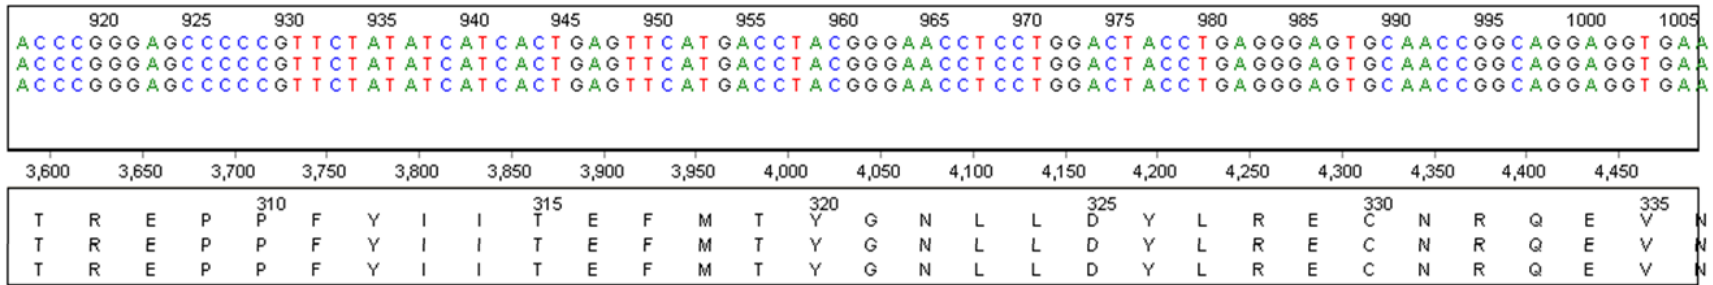

**ABL Reference Sequence**

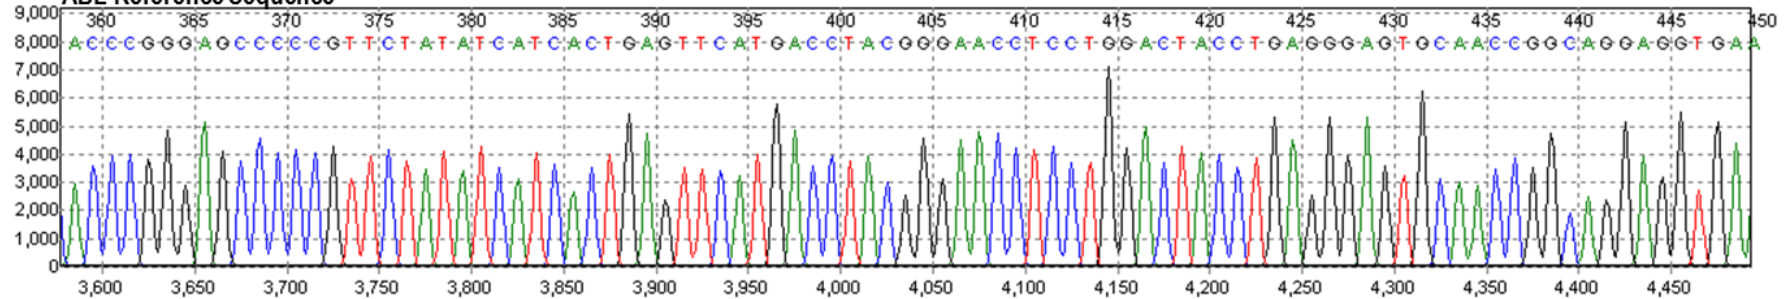

**#4 NIL**

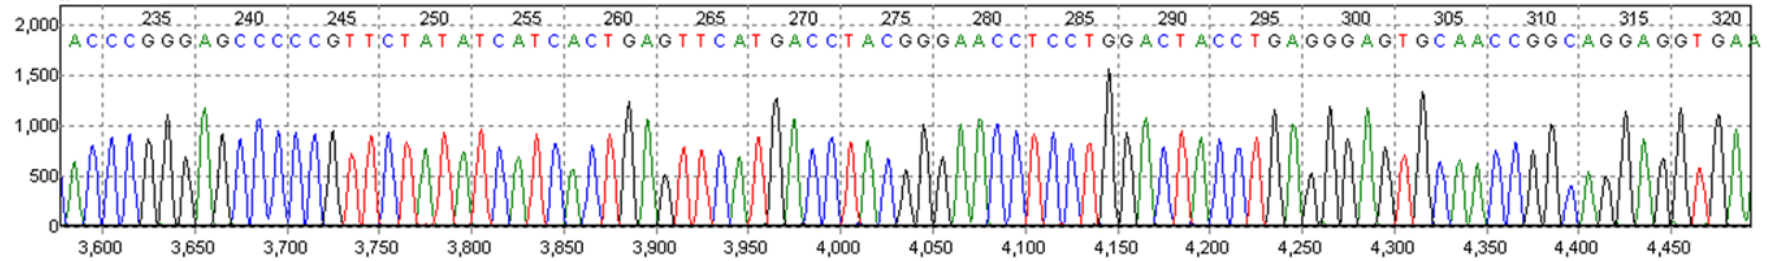

**#5 NIL**

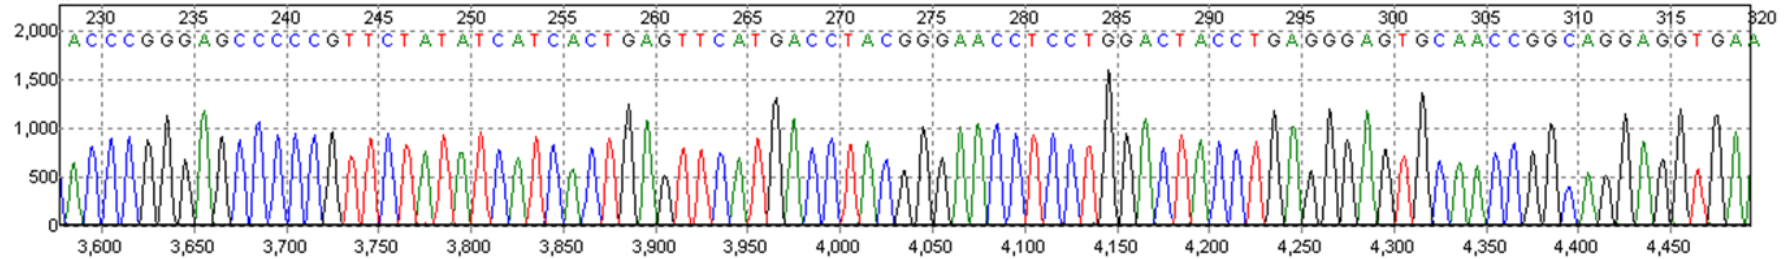

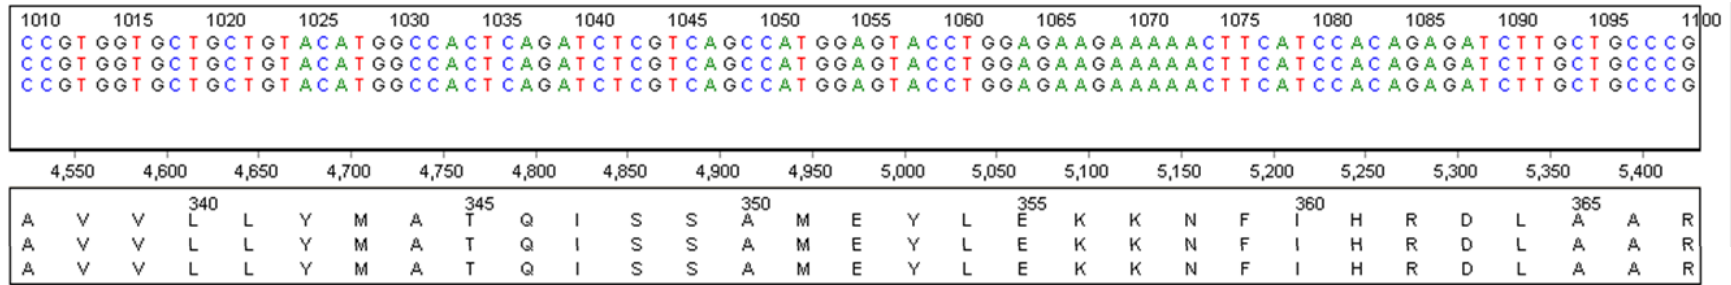

**ABL Reference Sequence**

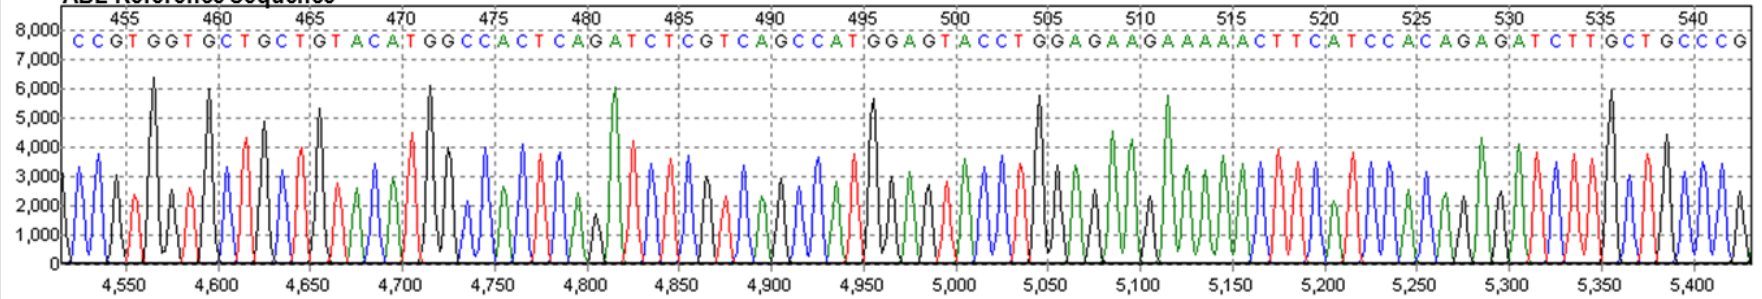

**#4 NIL**

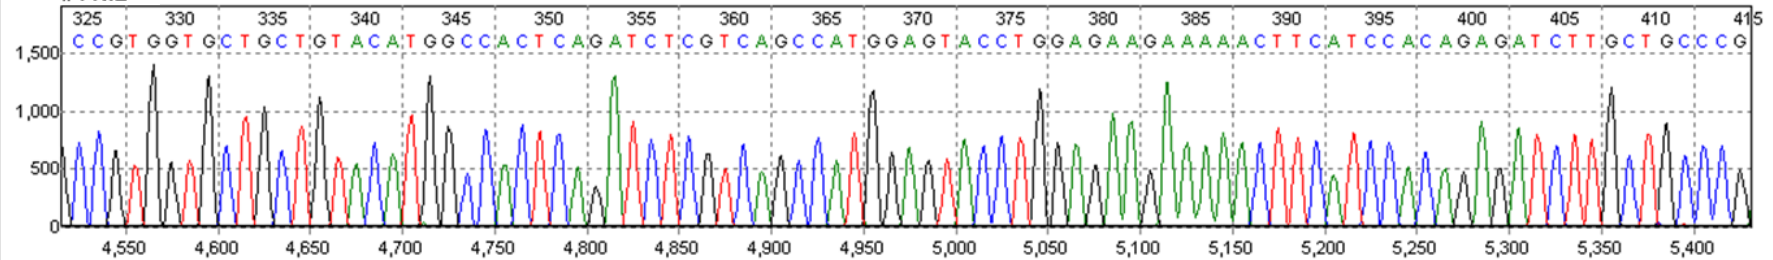

**#5 NIL**

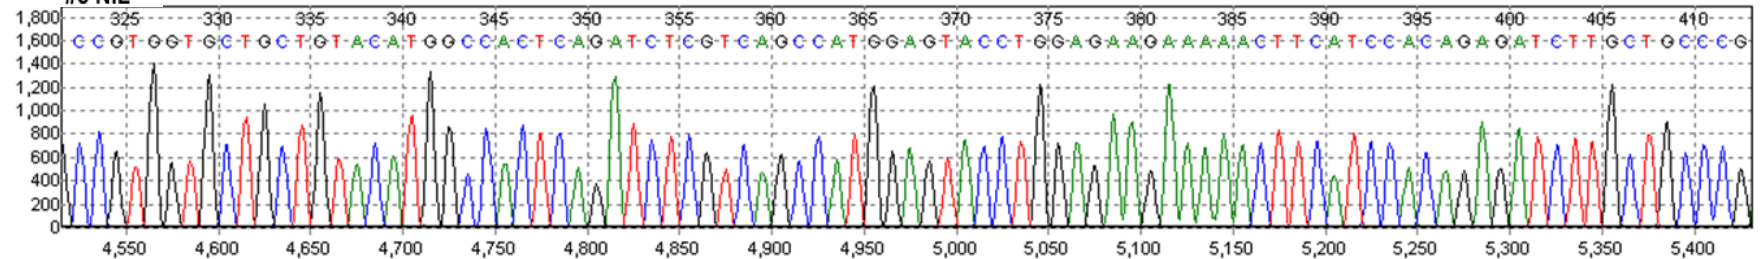

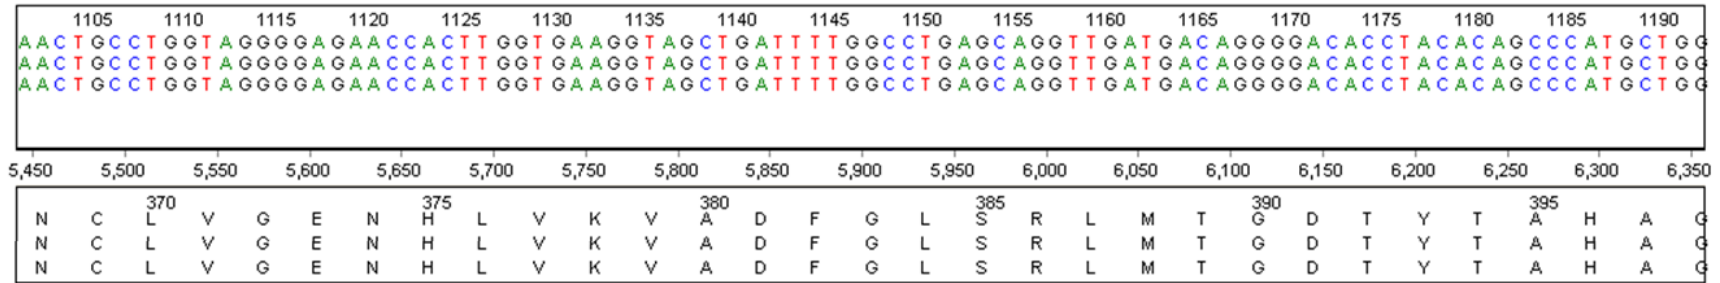

**ABL Reference Sequence**

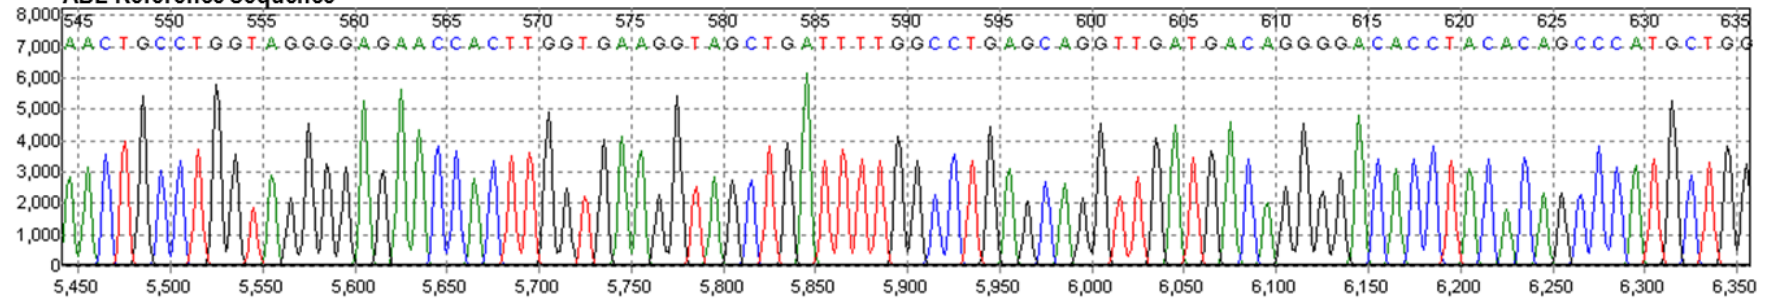

**#4 NIL**

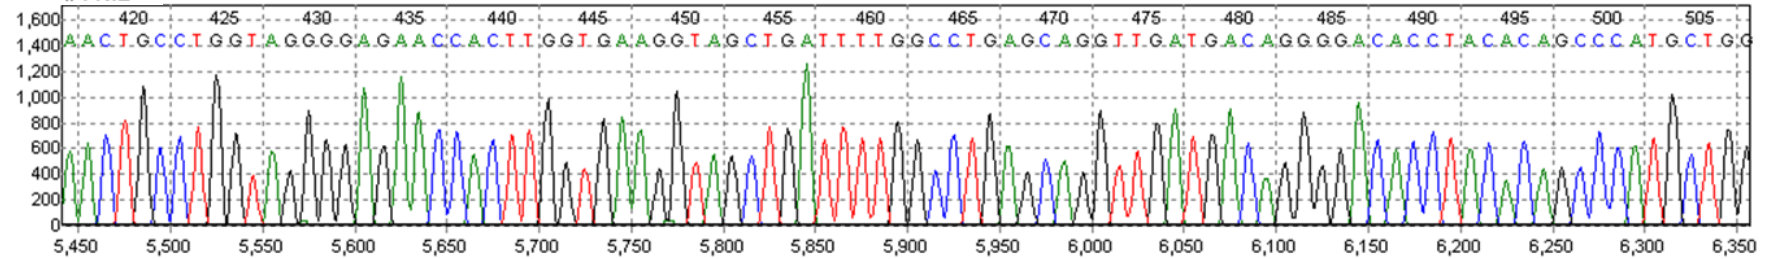

**#5 NIL**

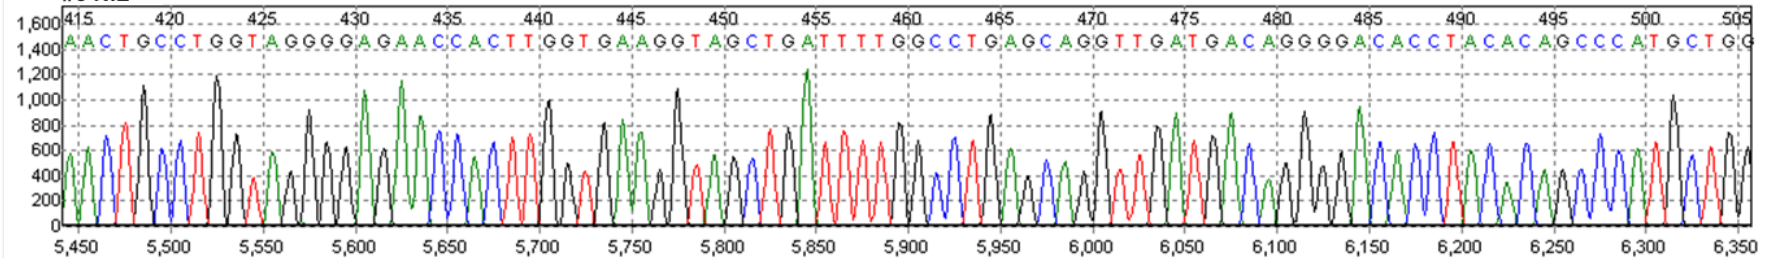



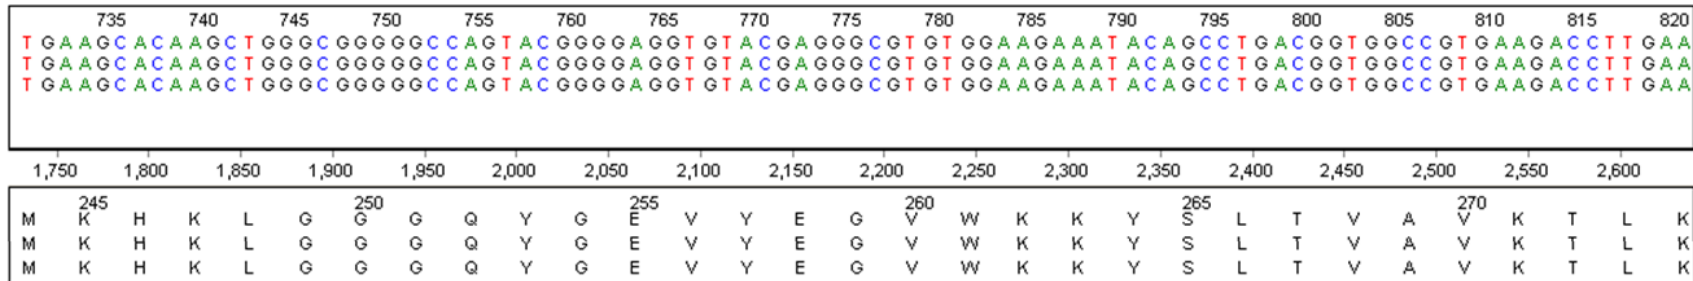

**ABL Reference Sequence**

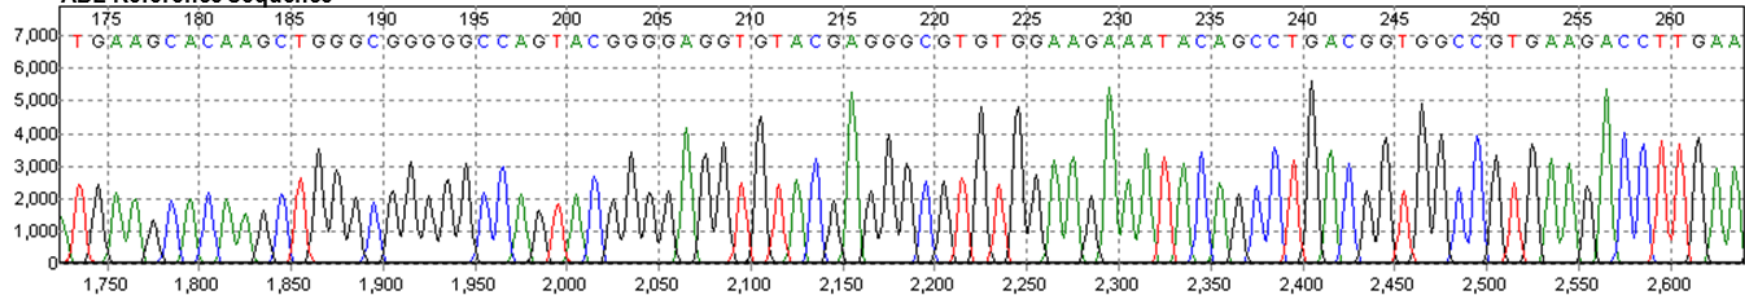

**#6 NIL**

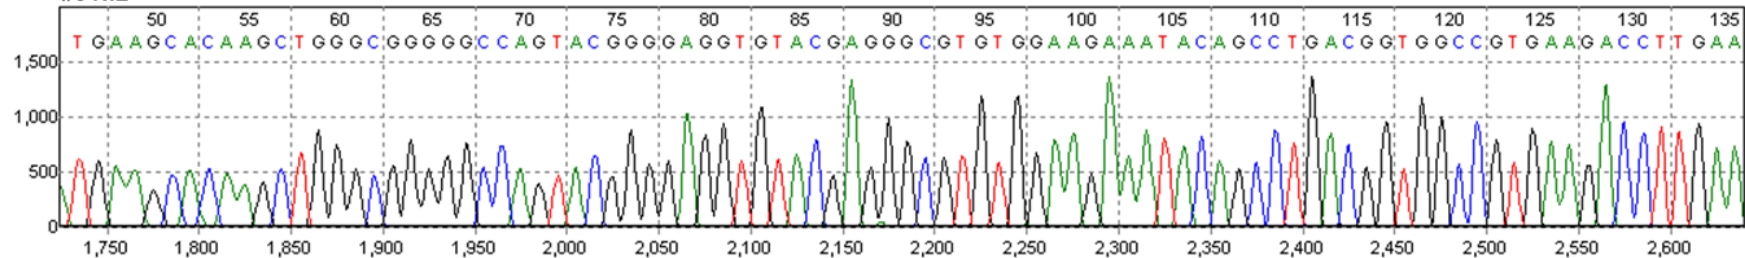

**#7 NIL**

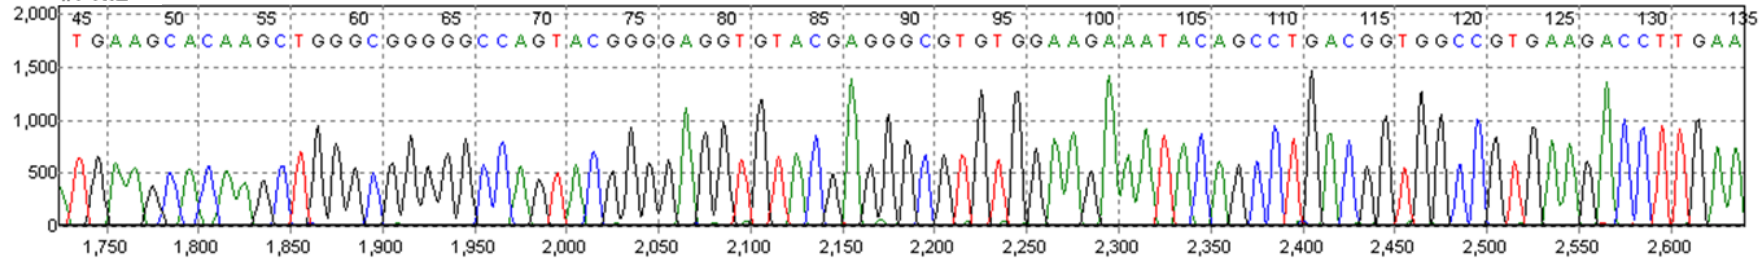

825 830 835 840 845 850 855 860 865 870 875 880 885 890 895 900 905 910  
 G A G G A C A C C A T G G A G G T G G A A G A G T T C T T G A A A G A A G C T G C A G T C A T G A A A G A G A T C A A A C A C C C T A A C C T G G T G C A G C T C C T T G G G G T C T G  
 G A G G A C A C C A T G G A G G T G G A A G A G T T C T T G A A A G A A G C T G C A G T C A T G A A A G A G A T C A A A C A C C C T A A C C T G G T G C A G C T C C T T G G G G T C T G  
 G A G G A C A C C A T G G A G G T G G A A G A G T T C T T G A A A G A A G C T G C A G T C A T G A A A G A G A T C A A A C A C C C T A A C C T G G T G C A G C T C C T T G G G G T C T G

2,650 2,700 2,750 2,800 2,850 2,900 2,950 3,000 3,050 3,100 3,150 3,200 3,250 3,300 3,350 3,400 3,450 3,500 3,550

275 280 285 290 295 300 305 310 315 320 325 330 335 340 345 350 355  
 E D T M E V E E F L K E A A V M K E I K H P N L V Q L L G V C  
 E D T M E V E E F L K E A A V M K E I K H P N L V Q L L G V C  
 E D T M E V E E F L K E A A V M K E I K H P N L V Q L L G V C

**ABL Reference Sequence**

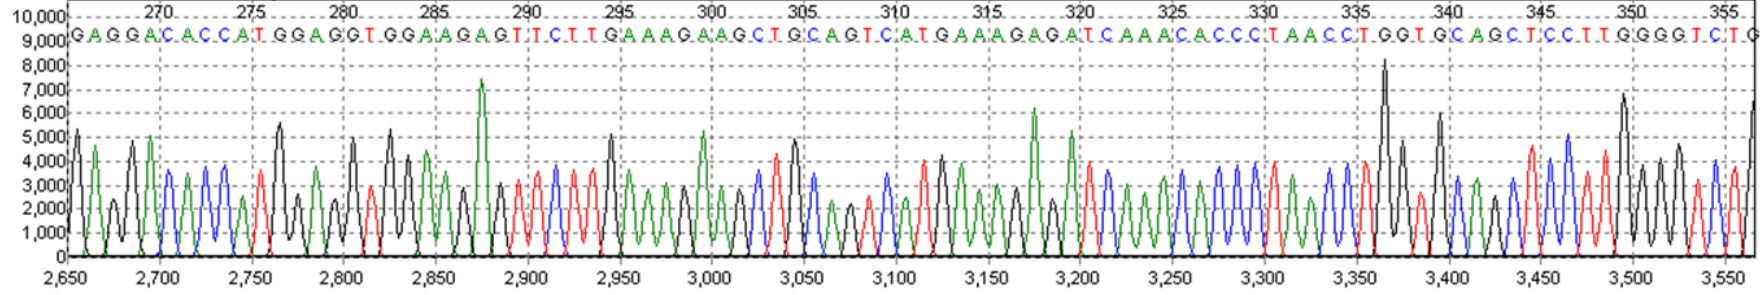

**#6 NIL**

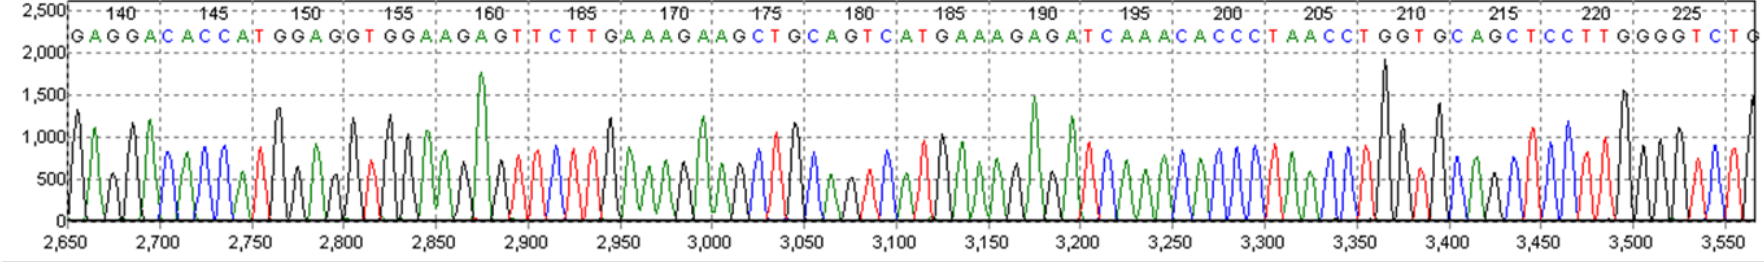

**#7 NIL**

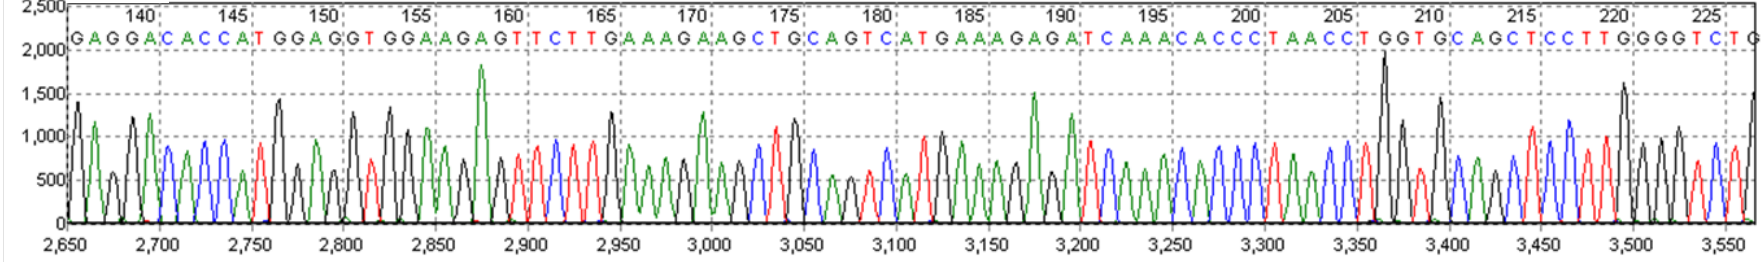

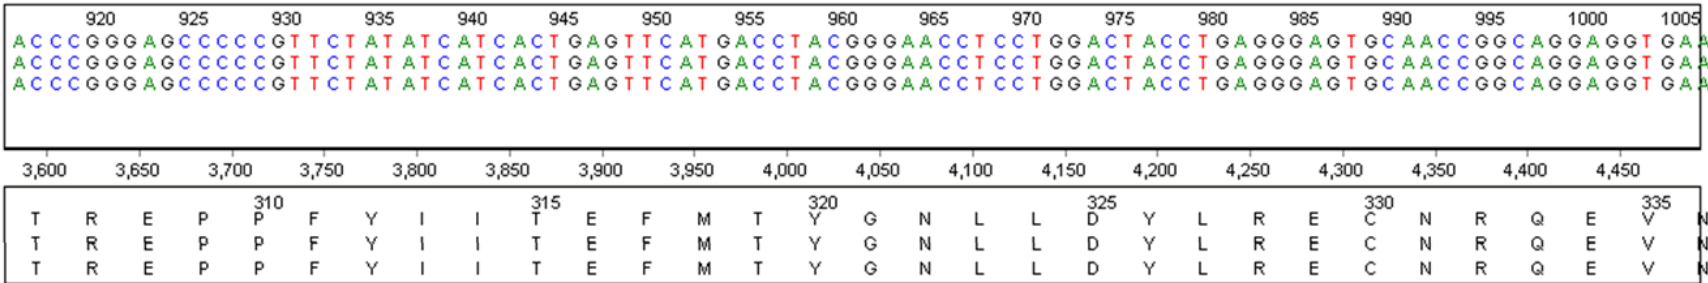

**ABL Reference Sequence**

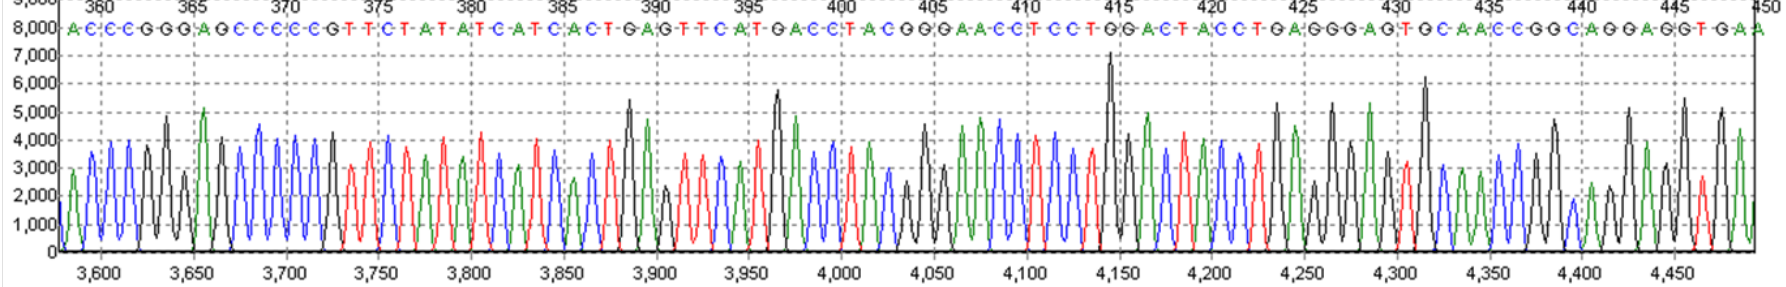

**#6 NIL**

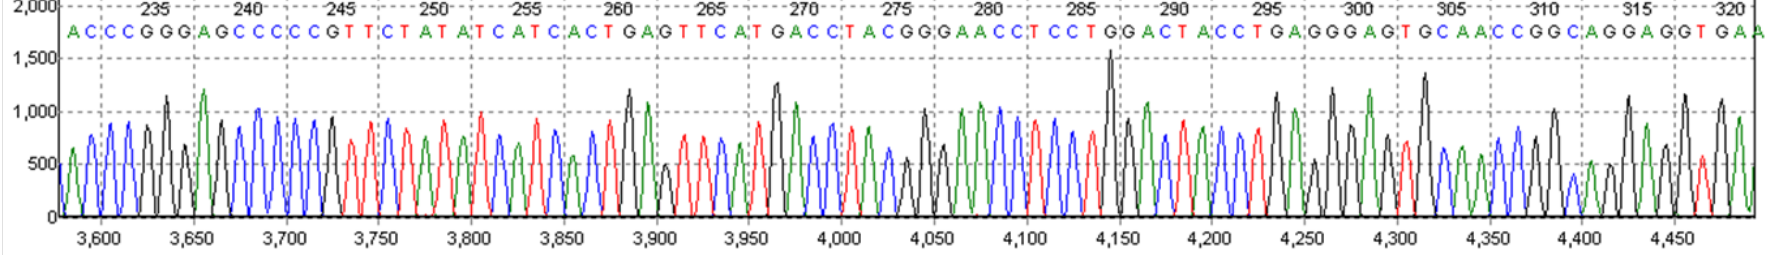

**#7 NIL**

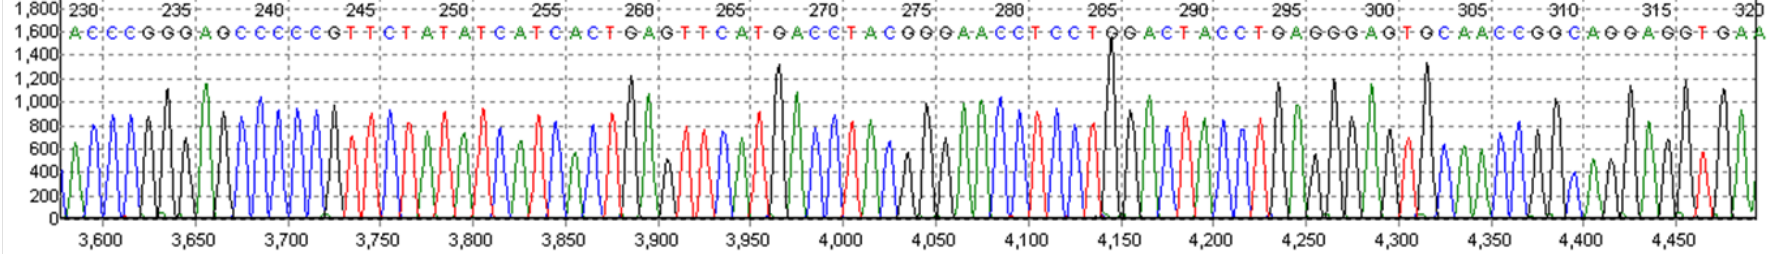

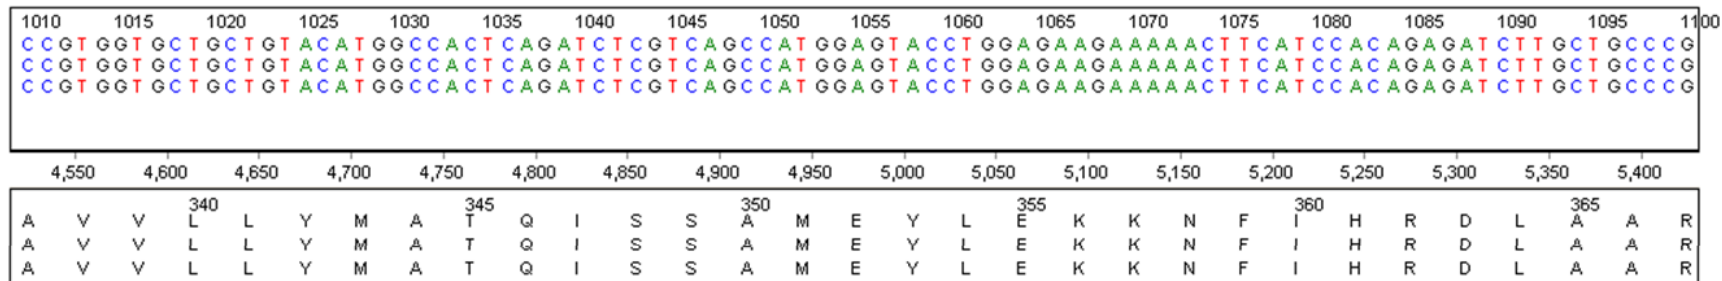

**ABL Reference Sequence**

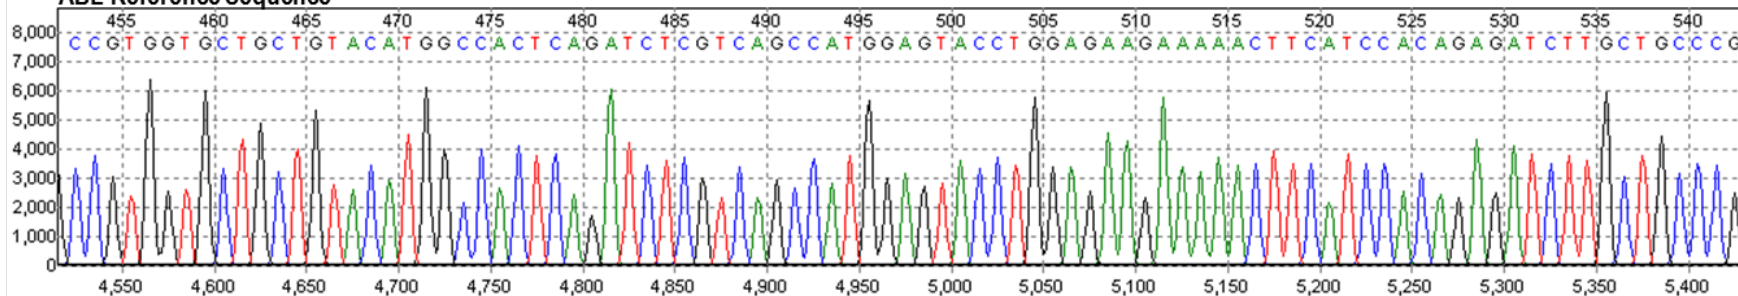

**#6 NIL**

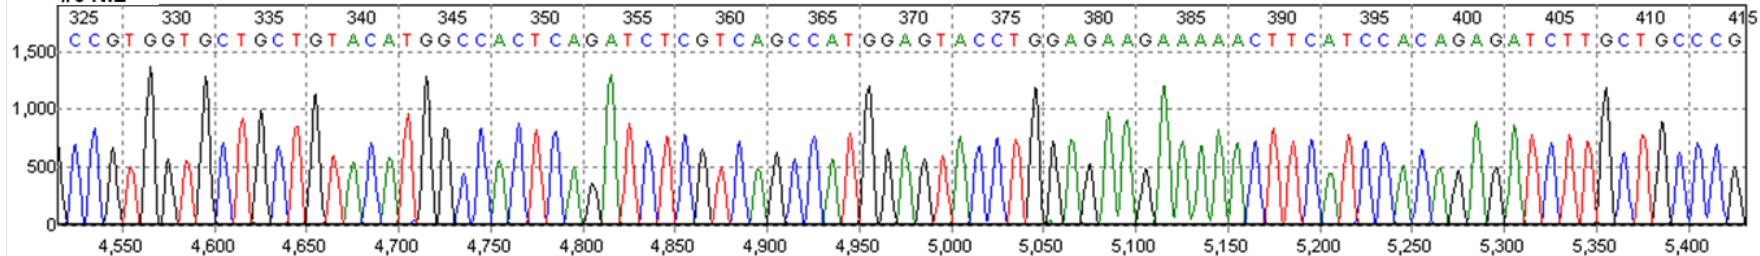

**#7 NIL**

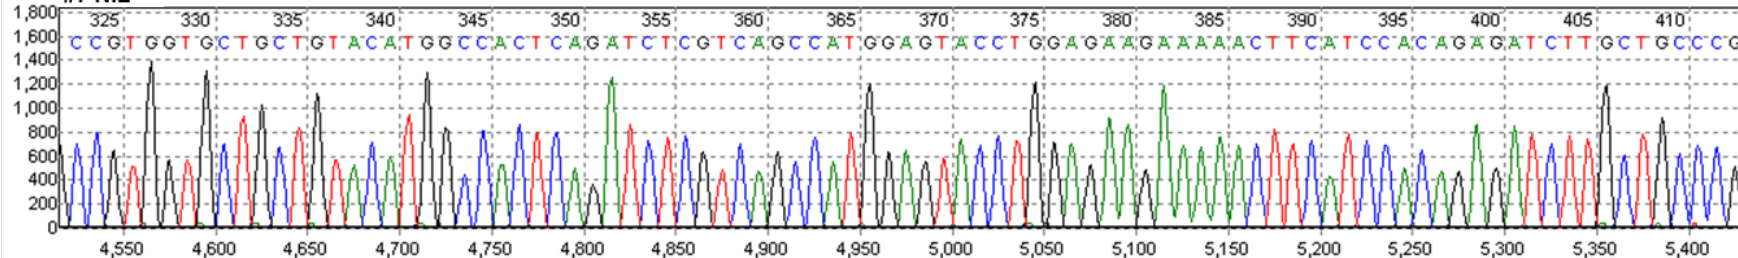

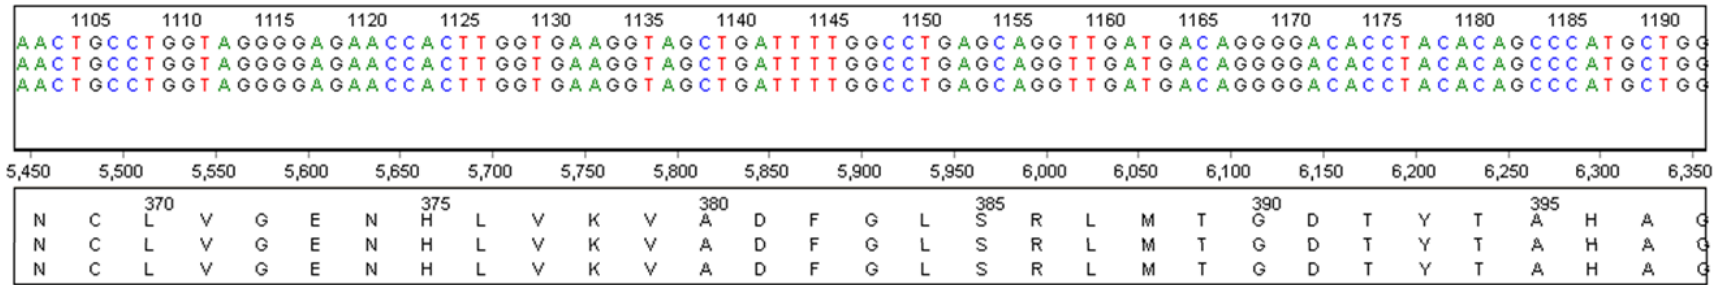

**ABL Reference Sequence**

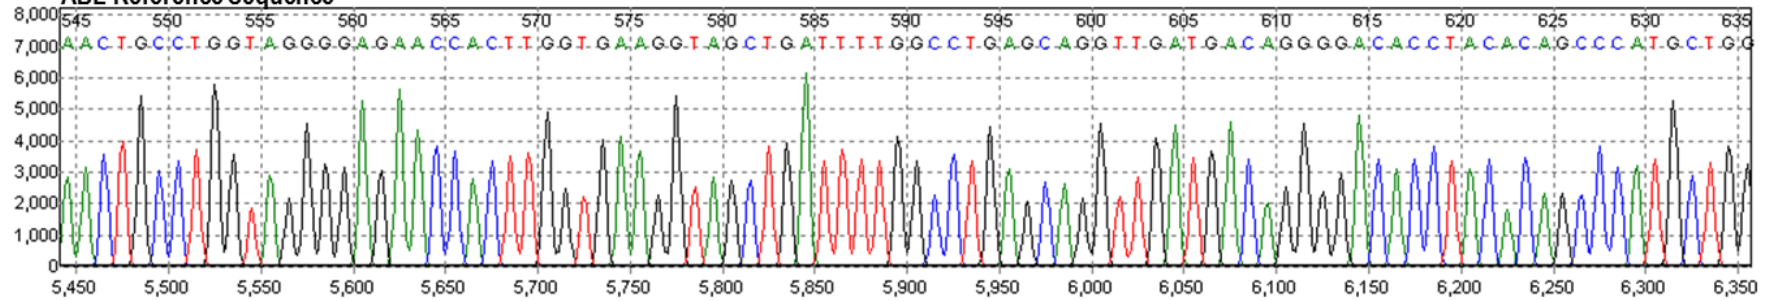

**#6 NIL**

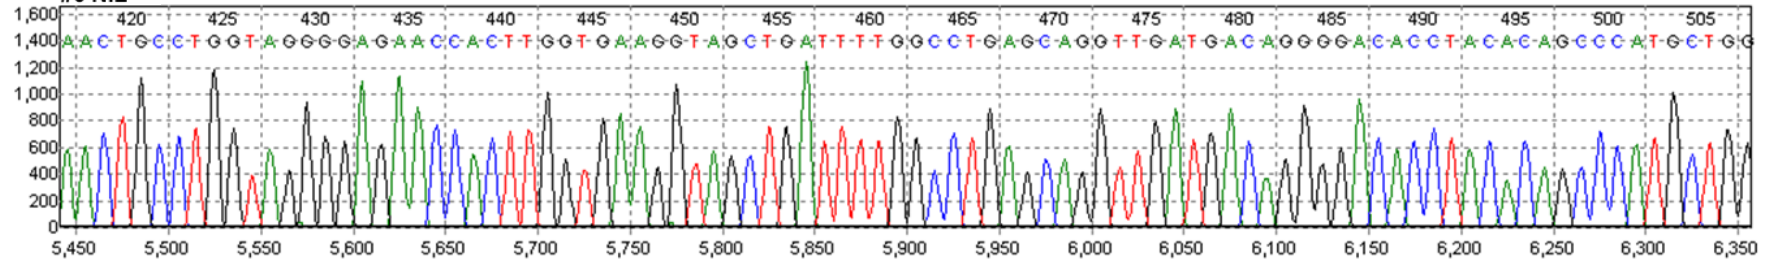

**#7 NIL**

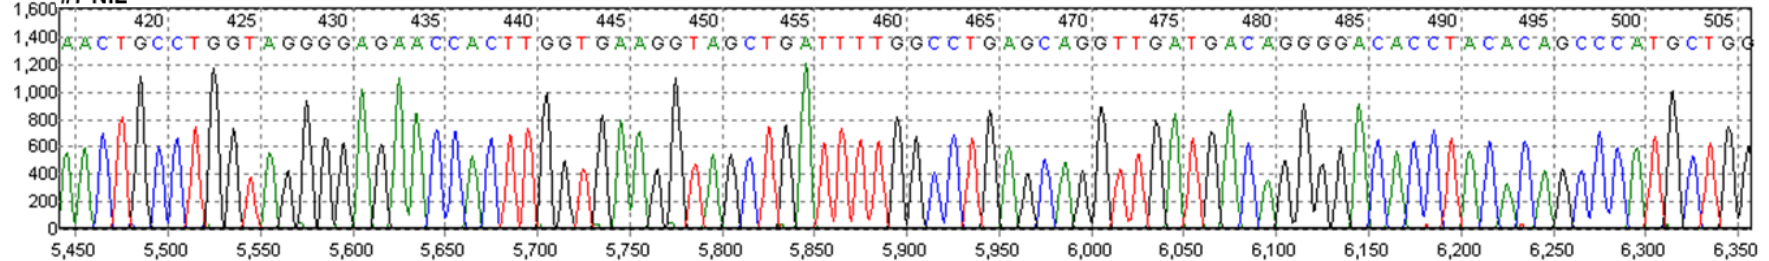

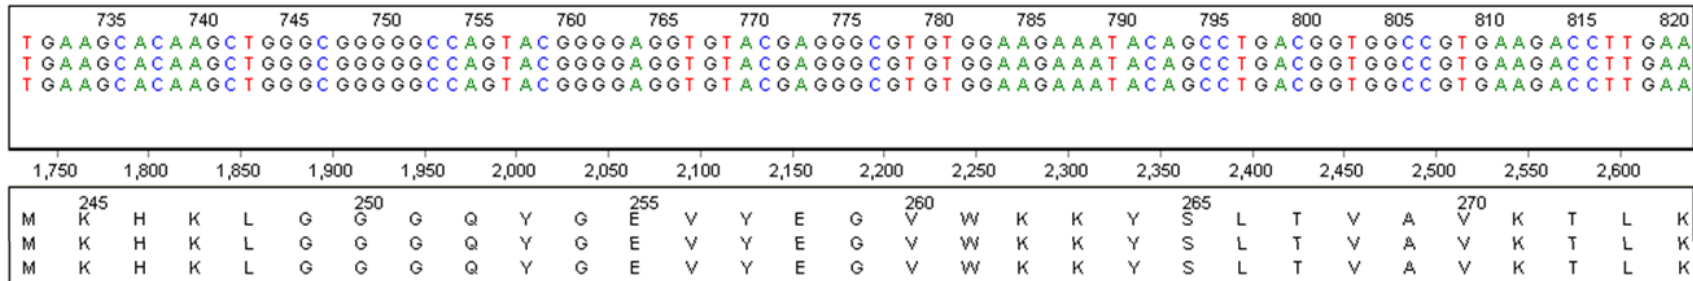

**ABL Reference Sequence**

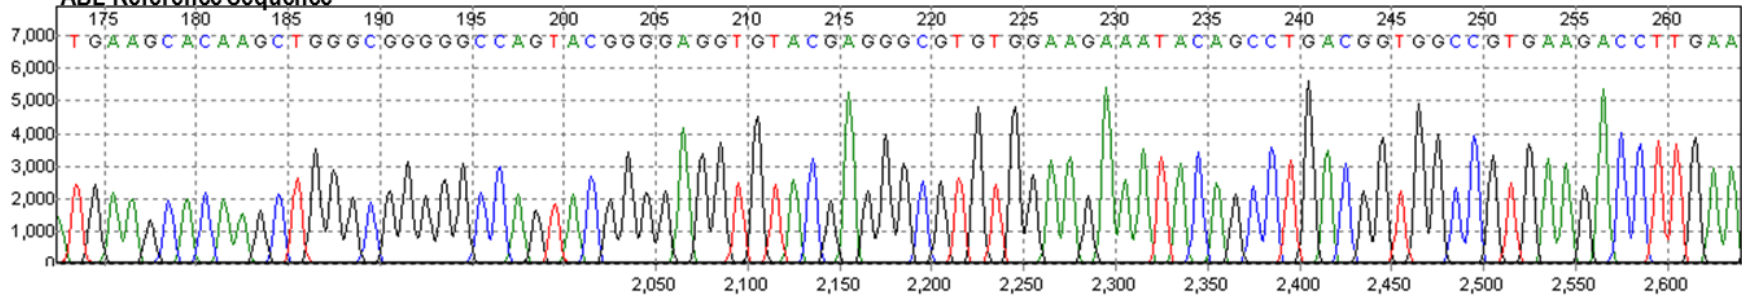

**#8 NIL**

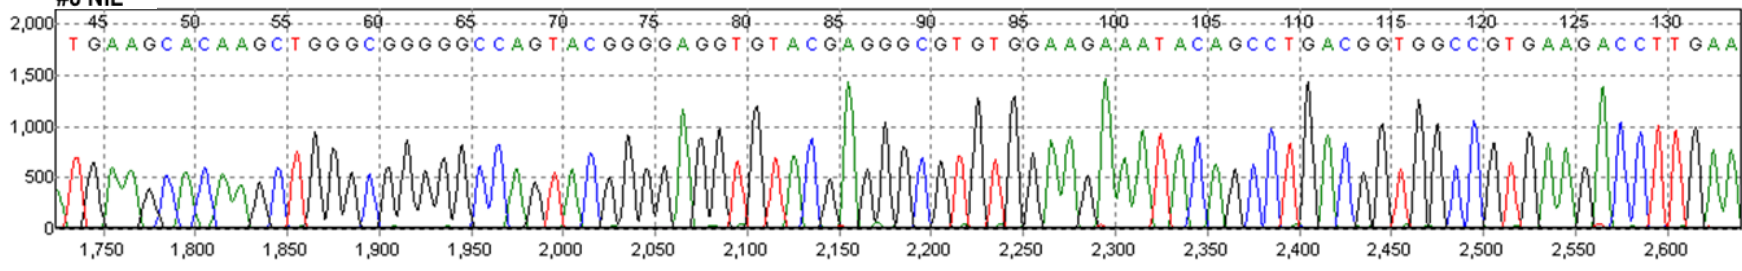

**#9 NIL**

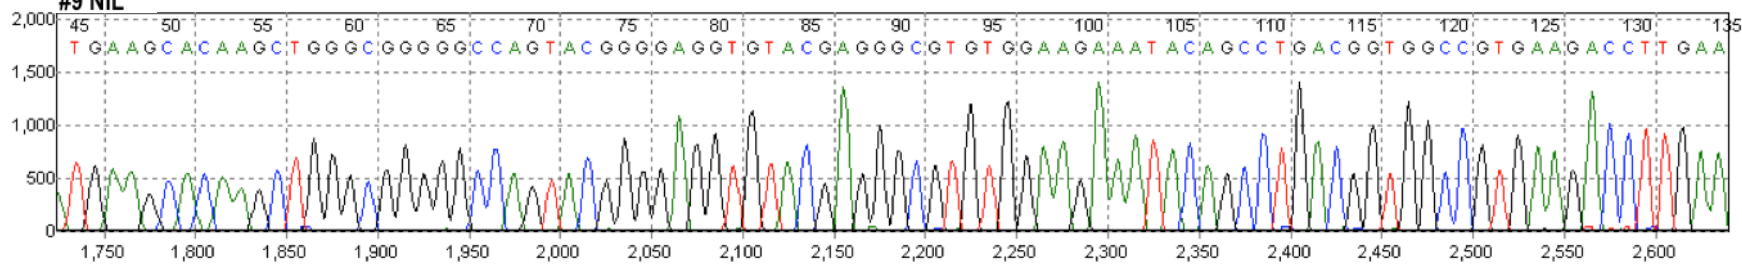

825 830 835 840 845 850 855 860 865 870 875 880 885 890 895 900 905 910  
 G A G G A C A C C A T G G A G G T G G A A G A G T T C T T G A A A G A A G C T G C A G T C A T G A A A G A G A T C A A A C A C C C T A A C C T G G T G C A G C T C C T T G G G G T C T G  
 G A G G A C A C C A T G G A G G T G G A A G A G T T C T T G A A A G A A G C T G C A G T C A T G A A A G A G A T C A A A C A C C C T A A C C T G G T G C A G C T C C T T G G G G T C T G  
 G A G G A C A C C A T G G A G G T G G A A G A G T T C T T G A A A G A A G C T G C A G T C A T G A A A G A G A T C A A A C A C C C T A A C C T G G T G C A G C T C C T T G G G G T C T G

2,650 2,700 2,750 2,800 2,850 2,900 2,950 3,000 3,050 3,100 3,150 3,200 3,250 3,300 3,350 3,400 3,450 3,500 3,550

275 280 285 290 295 300 305  
 E D T M E V E E F L K E A A V M K E I K H P N L V Q L L G V C  
 E D T M E V E E F L K E A A V M K E I K H P N L V Q L L G V C  
 E D T M E V E E F L K E A A V M K E I K H P N L V Q L L G V C

**ABL Reference Sequence**

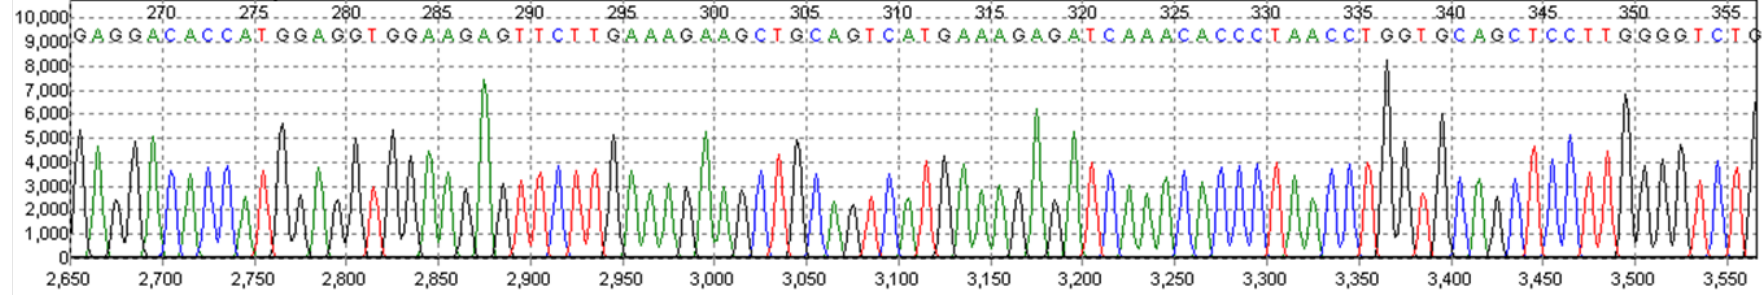

**#8 NIL**

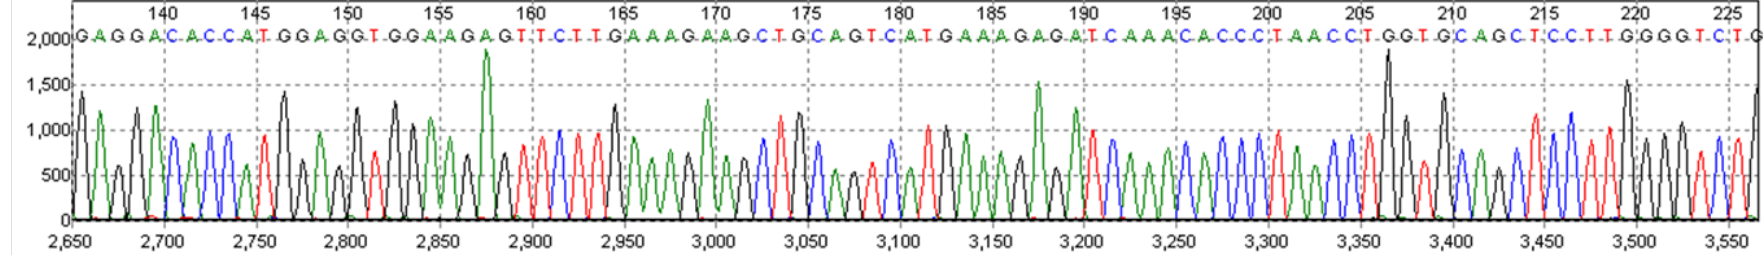

**#9 NIL**

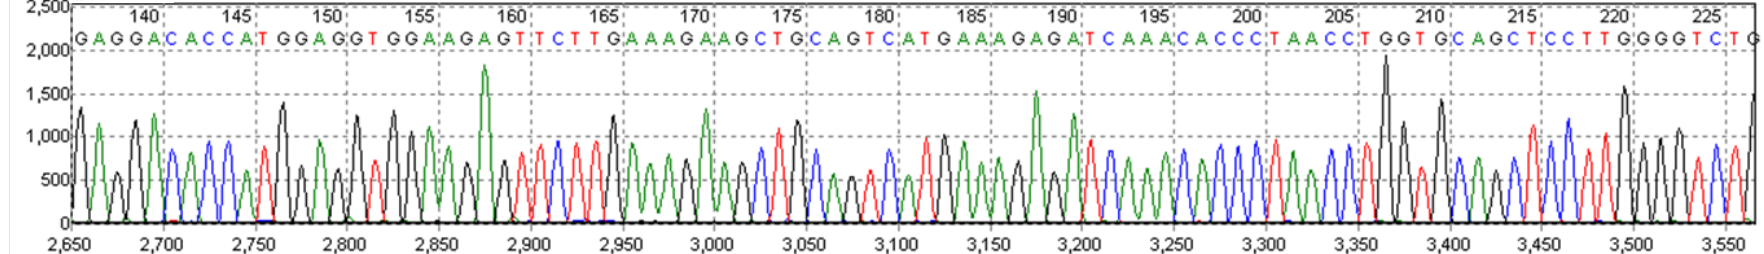

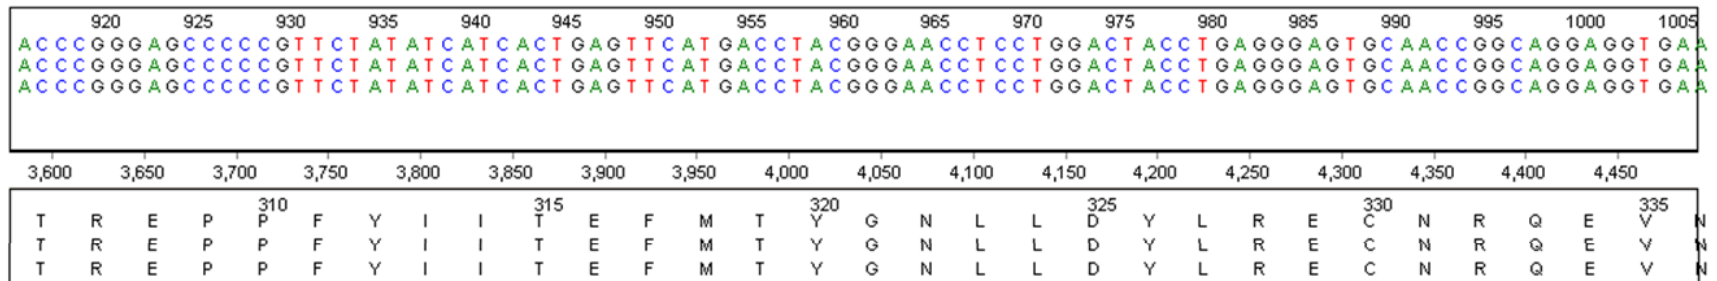

**ABL Reference Sequence**

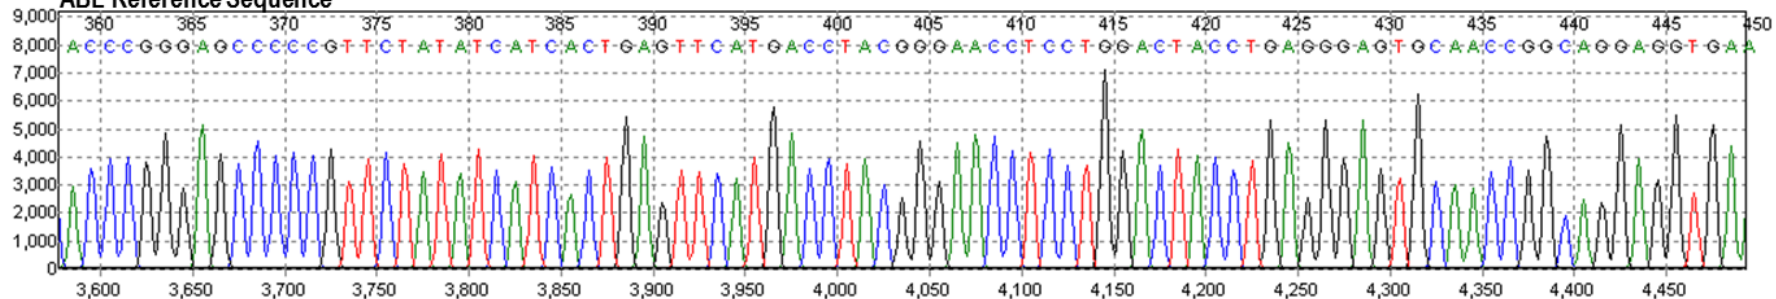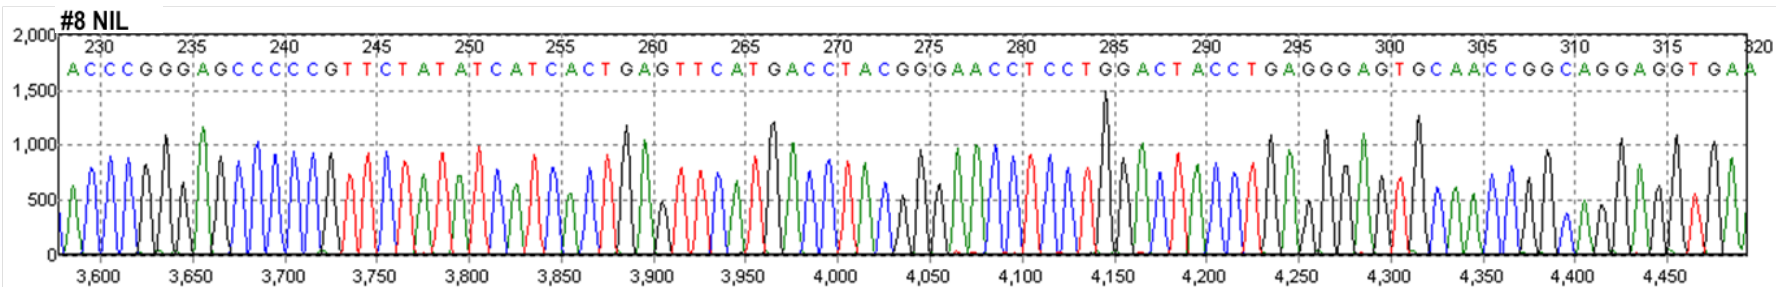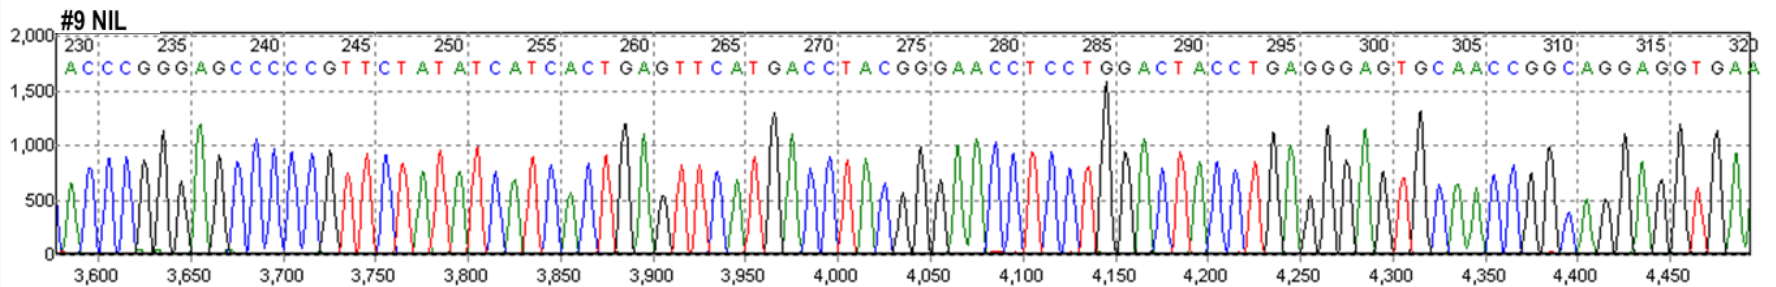



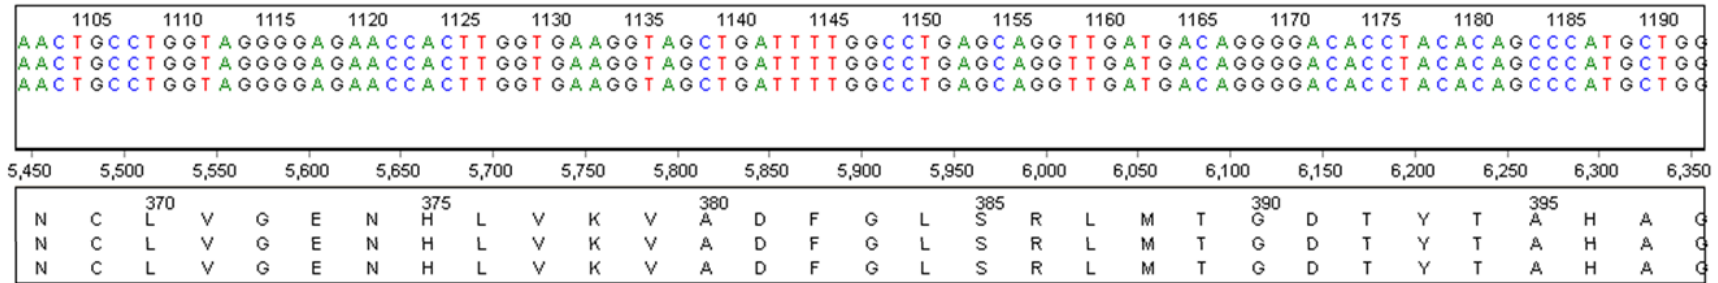

**ABL Reference Sequence**

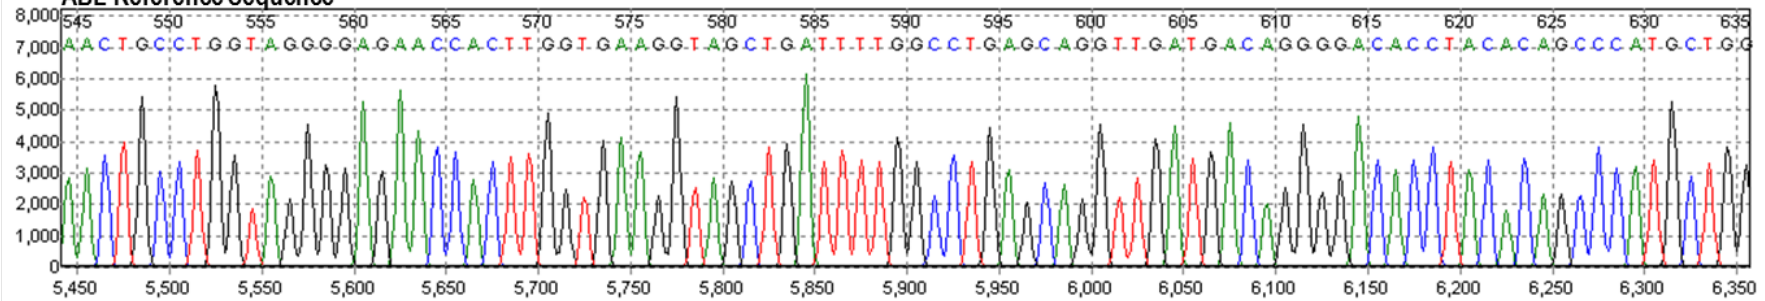

**#8 NIL**

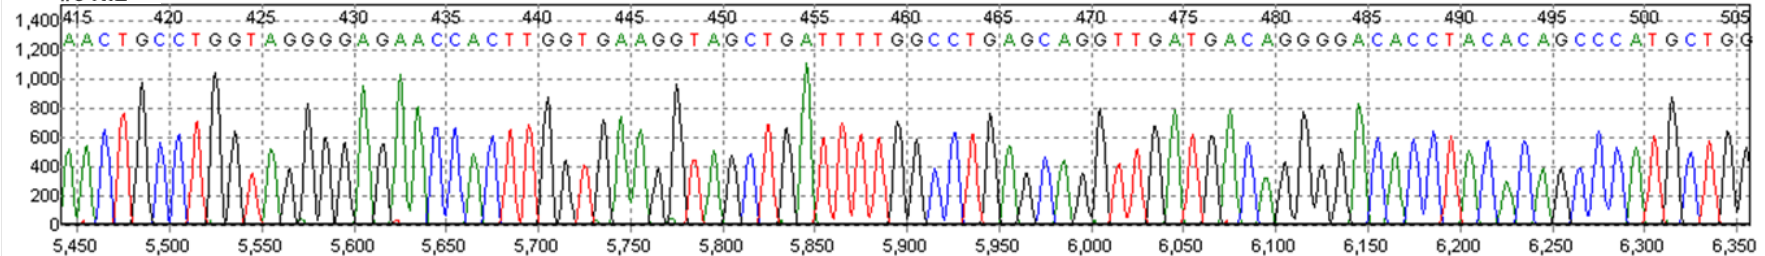

**#9 NIL**

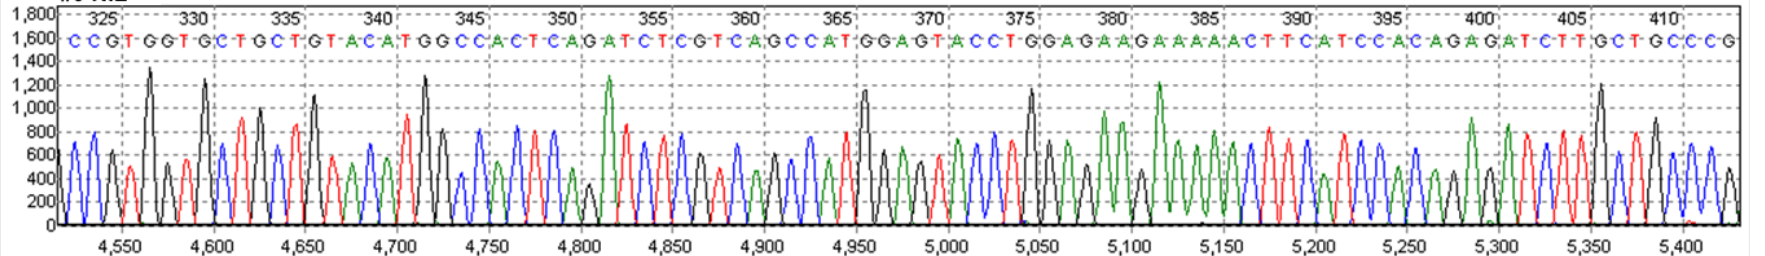

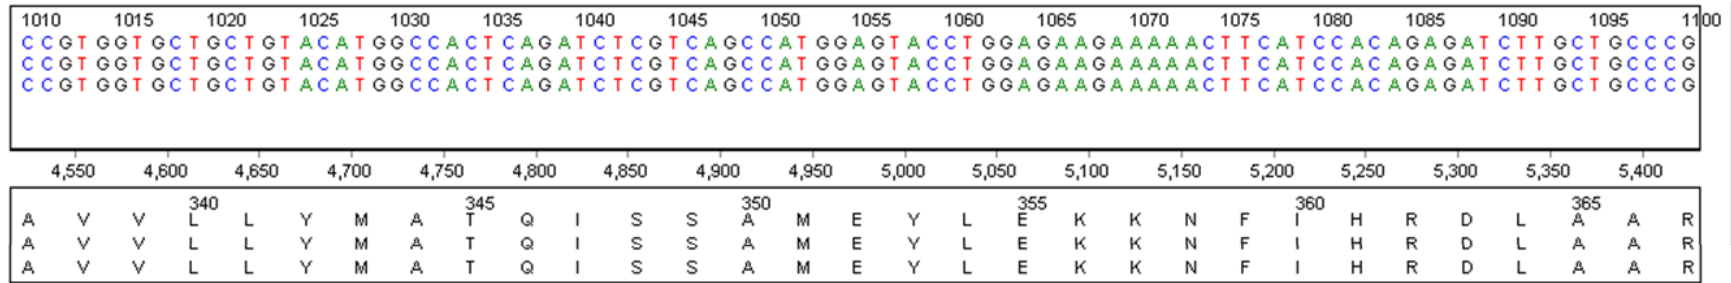

**ABL Reference Sequence**

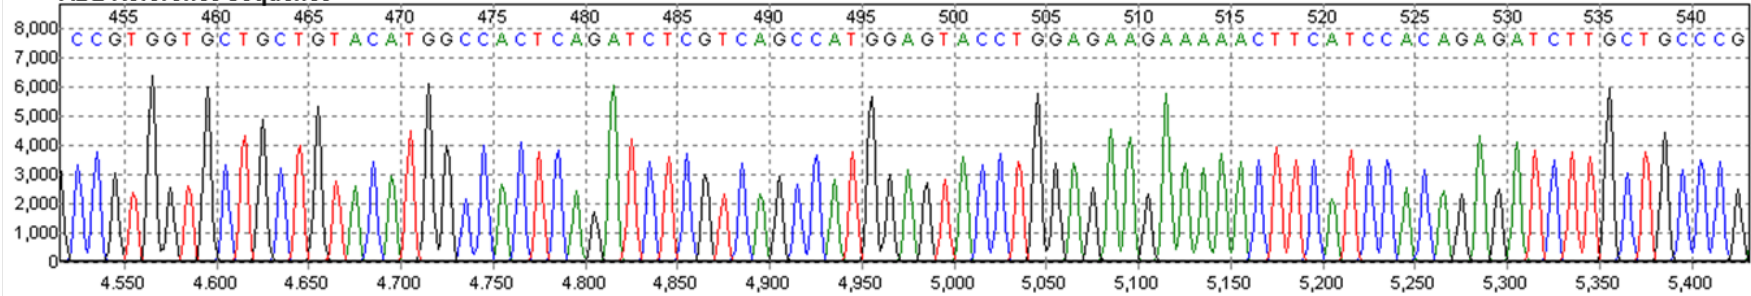

**#8 NIL**

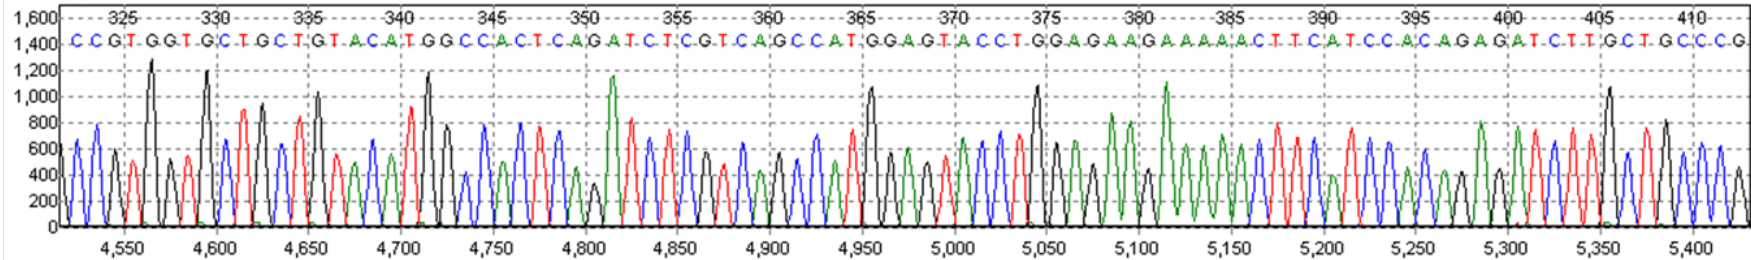

**#9 NIL**

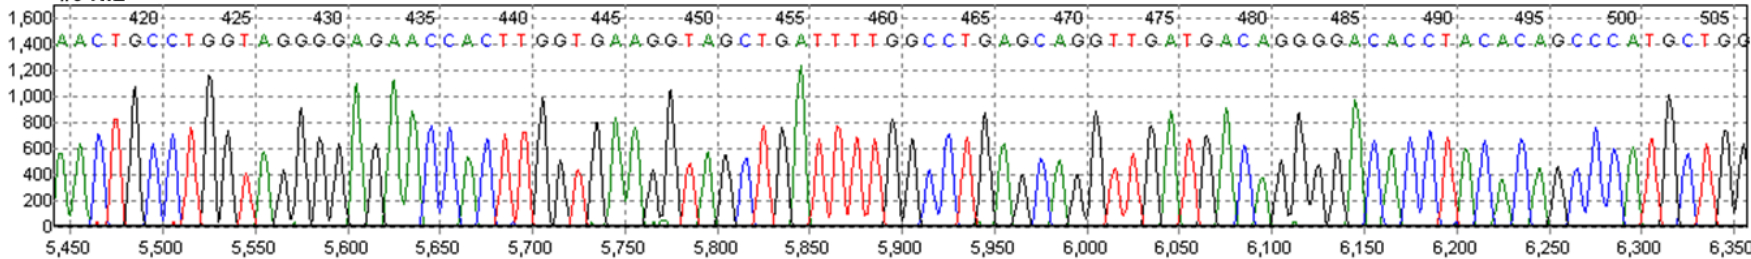

735 740 745 750 755 760 765 770 775 780 785 790 795 800 805 810 815 820

TGAAGCACAAAGCTGGGCGGGGGCCAGTACGGGGAGGGTGTACGAGGGCGTGTGGAAAGAAATACAGCCTGACGGTGGCCGTGAAGACCTTGAA  
TGAAGCACAAAGCTGGGCGGGGGCCAGTACGGGGAGGGTGTACGAGGGCGTGTGGAAAGAAATACAGCCTGACGGTGGCCGTGAAGACCTTGAA  
TGAAGCACAAAGCTGGGCGGGGGCCAGTACGGGGAGGGTGTACGAGGGCGTGTGGAAAGAAATACAGCCTGACGGTGGCCGTGAAGACCTTGAA

1,750 1,800 1,850 1,900 1,950 2,000 2,050 2,100 2,150 2,200 2,250 2,300 2,350 2,400 2,450 2,500 2,550 2,600

|   |   |   |   |   |   |   |   |   |   |   |   |   |   |   |   |   |   |   |   |   |   |   |   |   |   |   |   |   |   |   |
|---|---|---|---|---|---|---|---|---|---|---|---|---|---|---|---|---|---|---|---|---|---|---|---|---|---|---|---|---|---|---|
| M | K | H | K | L | G | G | G | Q | Y | G | E | V | Y | E | G | V | W | K | K | Y | S | L | T | V | A | V | K | T | L | K |
| M | K | H | K | L | G | G | G | Q | Y | G | E | V | Y | E | G | V | W | K | K | Y | S | L | T | V | A | V | K | T | L | K |
| M | K | H | K | L | G | G | G | Q | Y | G | E | V | Y | E | G | V | W | K | K | Y | S | L | T | V | A | V | K | T | L | K |

**ABL Reference Sequence**

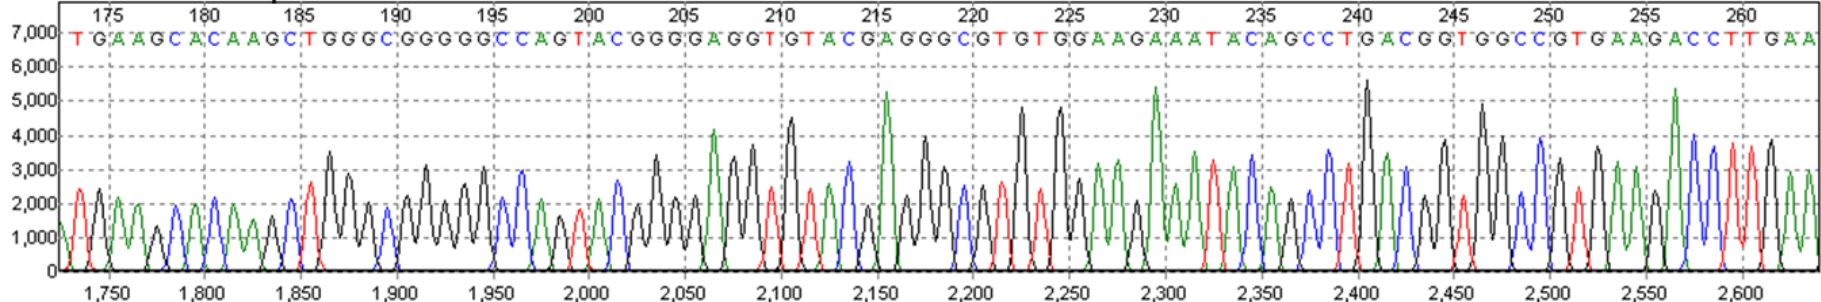

**#10 NIL**

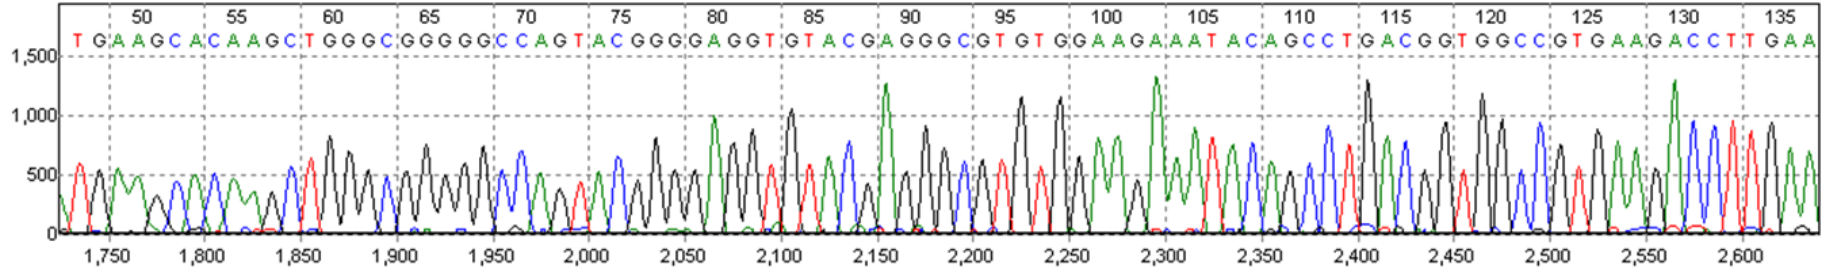

825 830 835 840 845 850 855 860 865 870 875 880 885 890 895 900 905 910  
 G A G G A C A C C A T G G A G G T G G A A G A G T T C T T G A A A G A A G C T G C A G T C A T G A A A G A G A T C A A A C A C C C T A A C C T G G T G C A G C T C C T T G G G G T C T G  
 G A G G A C A C C A T G G A G G T G G A A G A G T T C T T G A A A G A A G C T G C A G T C A T G A A A G A G A T C A A A C A C C C T A A C C T G G T G C A G C T C C T T G G G G T C T G  
 G A G G A C A C C A T G G A G G T G G A A G A G T T C T T G A A A G A A G C T G C A G T C A T G A A A G A G A T C A A A C A C C C T A A C C T G G T G C A G C T C C T T G G G G T C T G

2,650 2,700 2,750 2,800 2,850 2,900 2,950 3,000 3,050 3,100 3,150 3,200 3,250 3,300 3,350 3,400 3,450 3,500 3,550

275 280 285 290 295 300 305 310 315 320 325 330 335 340 345 350 355  
 E D T M E V E E F L K E A A V M K E I K H P N L V Q L L G V  
 E D T M E V E E F L K E A A V M K E I K H P N L V Q L L G V  
 E D T M E V E E F L K E A A V M K E I K H P N L V Q L L G V

**ABL Reference Sequence**

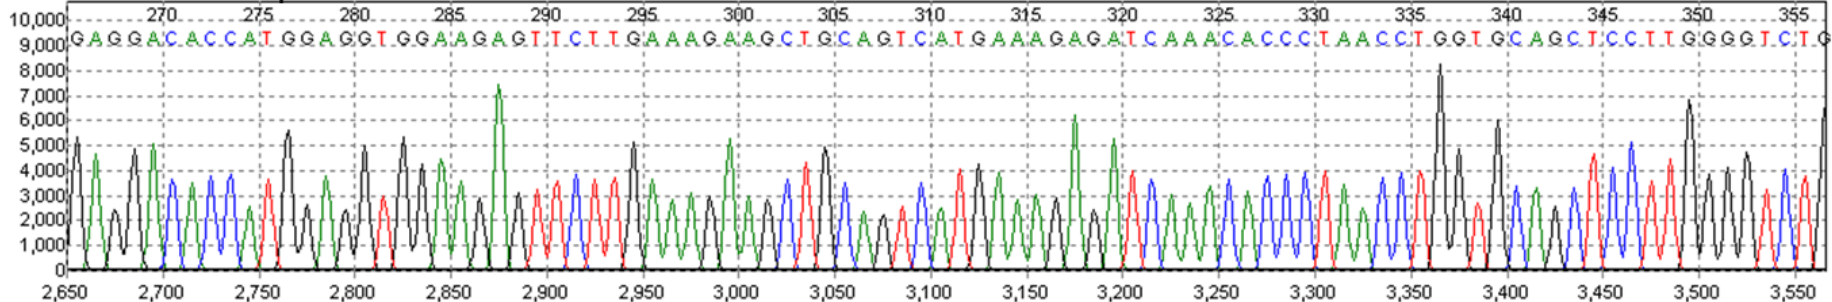

**#10 NIL**

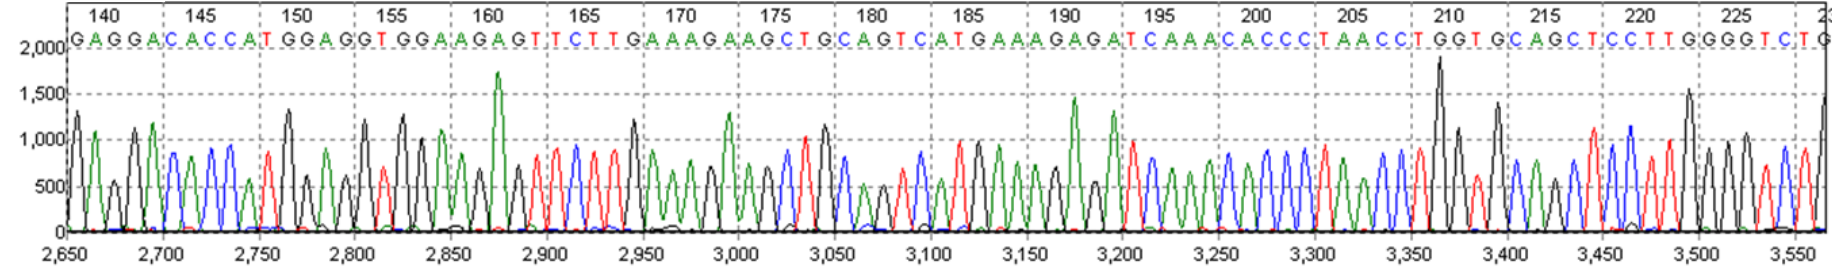

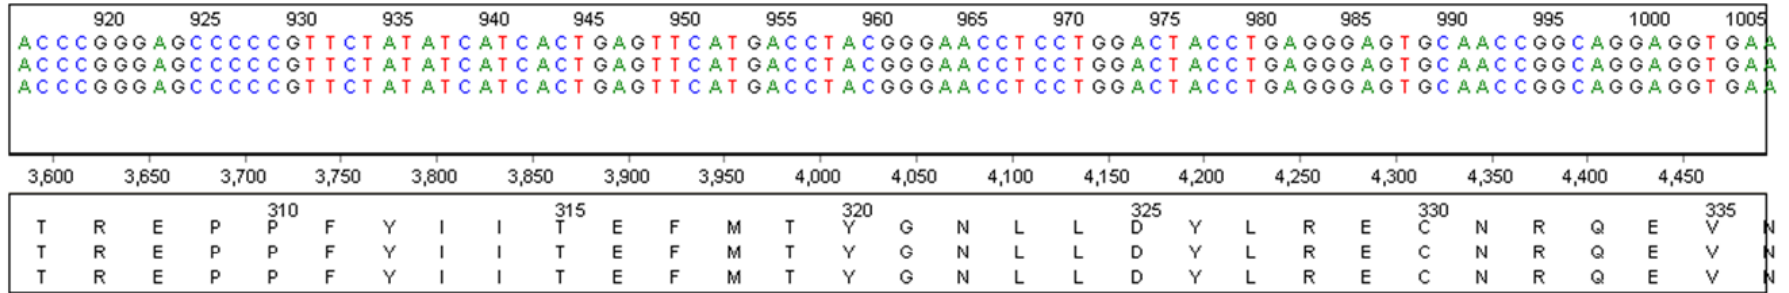

**ABL Reference Sequence**

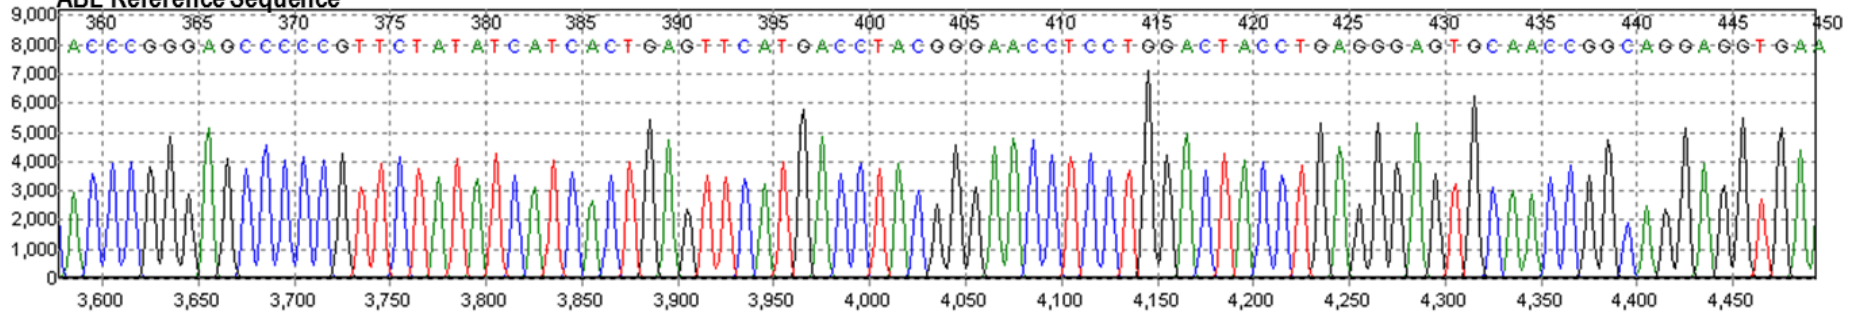

**#10 NIL**

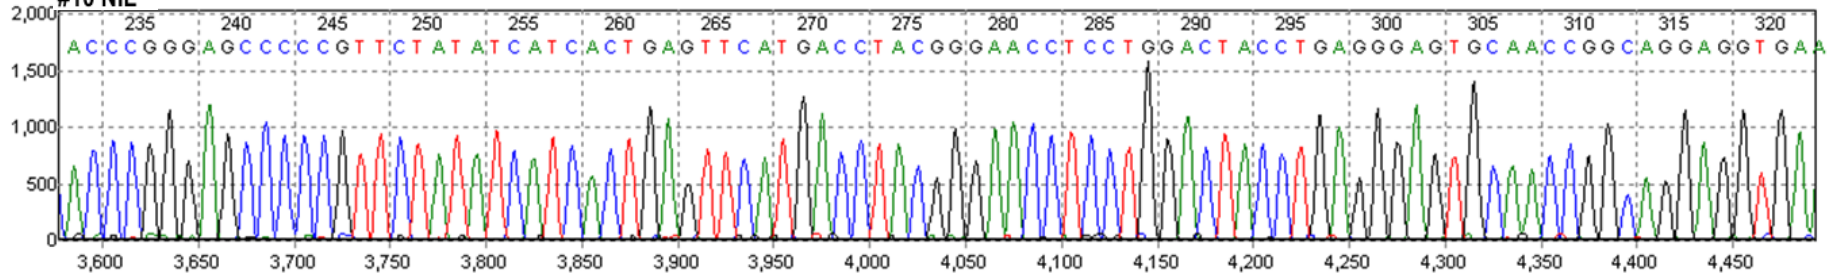

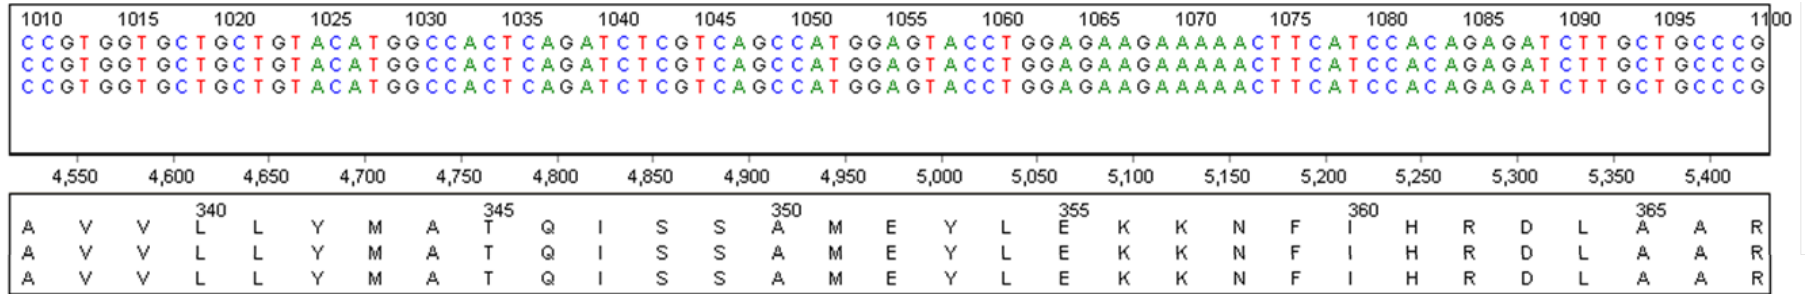

**ABL Reference Sequence**

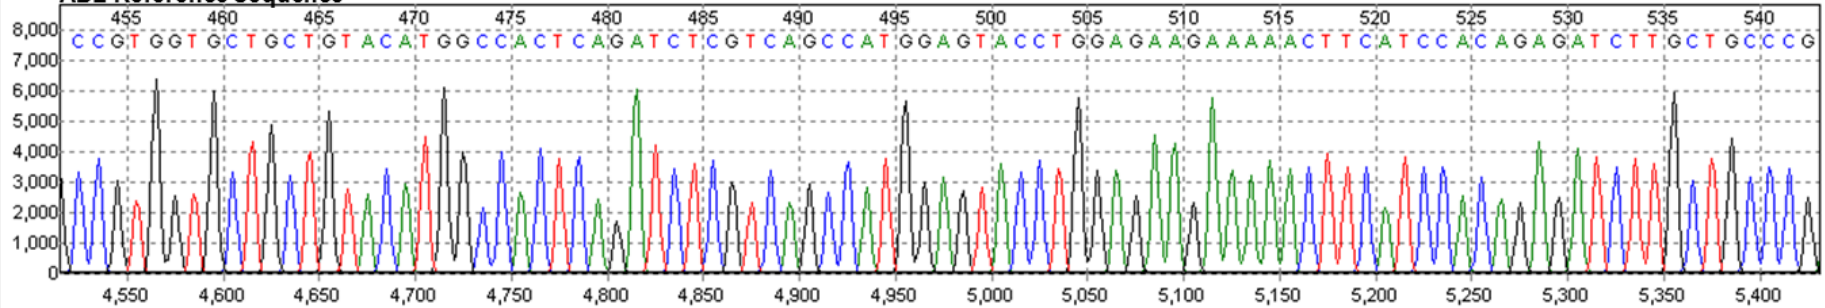

**#10 NIL**

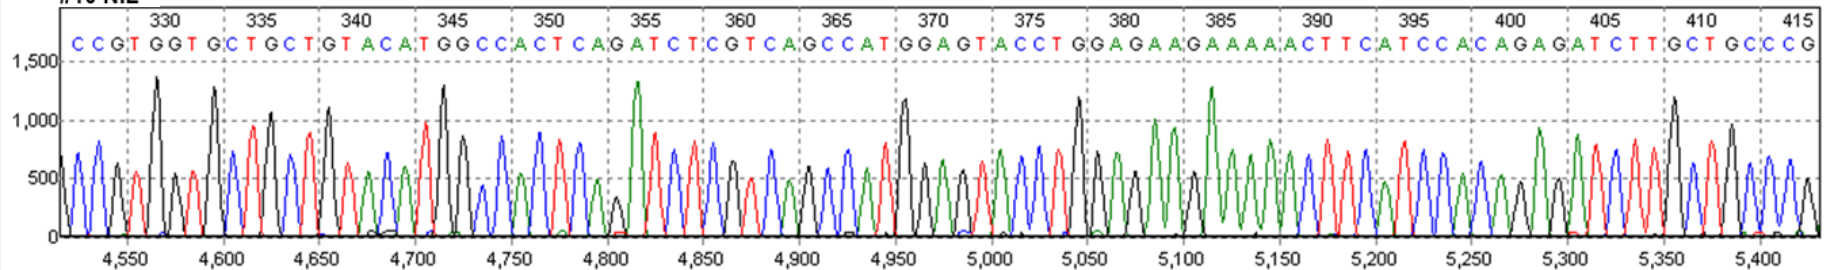

Supplement: pone.0161470.s001.pdf [file pone.0161470.s001.pdf]
